# NeuroMechFly, a neuromechanical model of adult *Drosophila melanogaster*

Victor Lobato Ríos<sup>1</sup>, Shravan Tata Ramalingasetty<sup>\*2</sup>, Pembe Gizem Özdil<sup>\*1,2</sup>,  
Jonathan Arreguit<sup>2</sup>, Auke Jan Ijspeert<sup>2</sup>, and Pavan Ramdya<sup>†1</sup>

<sup>1</sup>Neuroengineering Laboratory, Brain Mind Institute & Interfaculty Institute of  
Bioengineering, EPFL, Lausanne, Switzerland

<sup>2</sup>Biorobotics Laboratory, EPFL, Lausanne, Switzerland

## Abstract

Animal behavior emerges from a seamless interaction between neural network dynamics, musculoskeletal properties, and the physical environment. Accessing and understanding the interplay between these intertwined elements requires the development of integrative and morphologically realistic neuromechanical simulations. Until now, there has been no such simulation framework for the widely studied model organism, *Drosophila melanogaster*. Here we present NeuroMechFly, a data-driven model of the adult female fly within a physics-based simulation environment. NeuroMechFly combines a series of independent computational modules including a biomechanical exoskeleton with articulating body parts—legs, halteres, wings, abdominal segments, head, proboscis, and antennae—muscle models, and neural network controllers. To enable illustrative use cases, we first define minimal leg degrees-of-freedom by analyzing real 3D kinematic measurements during real *Drosophila* walking and grooming. Then, we show how, by replaying these behaviors using NeuroMechFly’s biomechanical exoskeleton in its physics-based simulation environment, one can predict otherwise unmeasured torques and contact reaction forces. Finally, we leverage NeuroMechFly’s full neuromechanical capacity to discover neural networks and muscle parameters that enable locomotor gaits optimized for speed and stability. Thus, NeuroMechFly represents a powerful testbed for building an understanding of how behaviors emerge from interactions between complex neuromechanical systems and their physical surroundings.

## 1 Introduction

Uncoupling the contributions to behavior of many neuronal and biomechanical elements is daunting. Systems-level numerical simulations can assist in this ambitious goal by consolidating data into a dynamic framework, generating predictions to be tested, and probing the sufficiency of prevailing theories to account for experimental observations [1–6]. Computational models, including neuromechanical simulations, have long played a particularly important role in the study of movement control in vertebrates [7–10] and invertebrates, including stick insects [11–14], cockroaches [15, 16], praying mantises [17], and ants [18].

For animals like invertebrates with a relatively small number of neurons that can be identified across individuals, a mapping of real to simulated biomechanical or circuit elements might enable a cross-talk whereby models make predictions that can then be tested experimentally. However, for many of the animals for which neuromechanical models currently exist, there is a dearth or absence of genetic tools that would facilitate repeatedly recording, or perturbing the same neurons across animals. By contrast, for a few commonly studied ‘model’ organisms, a dialogue between experimental results and computational predictions represents an exciting but largely unrealized opportunity. This is recently enabled by advances in computing power, the realism of physics-based simulation environments, and improvements in numerical optimization approaches. Neuromechanical models of some commonly studied organisms have already been developed including for the worm

\*equal contribution

†corresponding author: [pavan.ramdya@epfl.ch](mailto:pavan.ramdya@epfl.ch)

37 (*Caenorhabditis elegans* [19, 20]), maggots (larval *Drosophila melanogaster* [21]), and rodents [22].  
 38 However, for the adult fly, *Drosophila melanogaster*, only 2-dimensional (2D) [23] and morphologically  
 39 unrefined [24] neuromechanical models exist.

40 Adult flies are an ideal organism for establishing a synergy between experimental and computa-  
 41 tional neuroscience. First, flies generate a large repertoire of complex behaviors including groom-  
 42 ing [25], courtship [26], flight [27], and walking [28, 29] which they use to navigate complex environ-  
 43 ments [30]. The kinematics of these behaviors can now be quantified precisely using deep learning-  
 44 based computer vision tools [31, 32] in 3-dimensions (3D) [33, 34]. Second, flies have a relatively  
 45 small number of neurons that can be repeatedly genetically targeted [35] for recordings or perturba-  
 46 tions in tethered, behaving animals [36–39]. These neurons can also be placed within their circuit  
 47 context using recently acquired brain and ventral nerve cord (VNC) connectomes [40, 41]. We pre-  
 48 viously developed a simple physics-based simulation of adult *Drosophila melanogaster* to investigate  
 49 hexapod locomotor gaits [24]. However, this older model has a number of important limitations that  
 50 restrict its widespread use: it lacks (i) the morphological accuracy needed to simulate mass distribu-  
 51 tions, compliance, and physical constraints, (ii) muscle models and their associated passive dynamical  
 52 properties, as well as (iii) neural networks or other control architectures.

53 Here we describe NeuroMechFly, a neuromechanical model of adult *Drosophila* that fills this  
 54 methodological gap by incorporating a new, open-source computational framework consisting of ex-  
 55 changeable modules which provide access to biomechanics, neuromuscular control, and parameter  
 56 optimization approaches. These modules maintain the capacity for whole organism simulation while  
 57 also facilitating further open source extensions and improvements by the scientific community. Thus,  
 58 NeuroMechFly is a completely new modeling framework and not simply an improvement of an earlier  
 59 model [24].

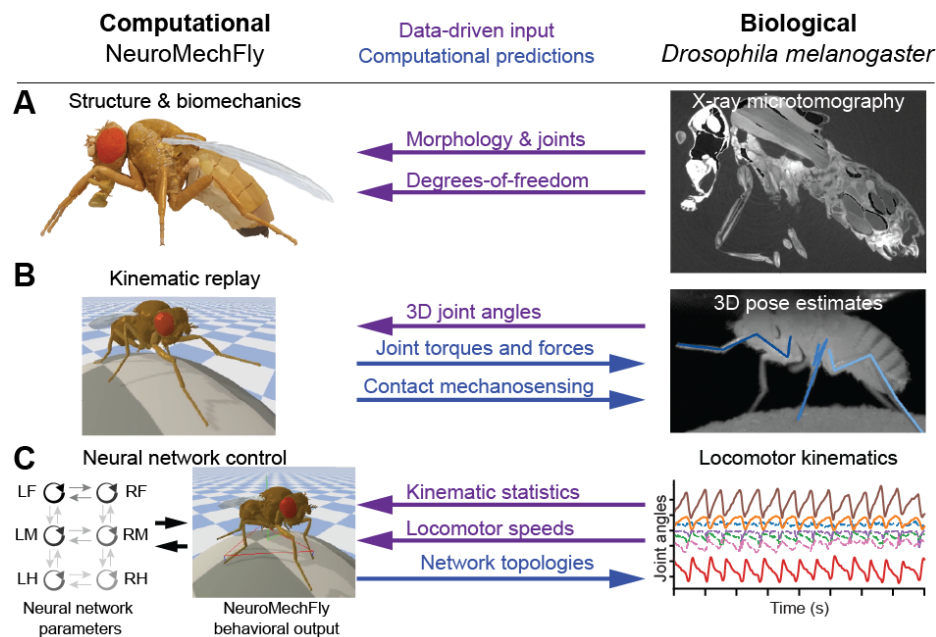

60

61 **Figure 1: Data-driven development and applications of NeuroMechFly.** (A) Body  
 62 structures—morphology, joint locations, and degrees-of-freedom—were defined by x-ray microtomog-  
 63 raphy and kinematic measurements. (B) Real 3D poses were used to replay kinematics in the model  
 64 permitting the prediction of unmeasured contact reaction forces and joint torques. (C) Real limb  
 65 kinematics were used to constrain the evolutionary optimization of neuromuscular parameters aiming  
 66 to satisfy high-level objectives for walking—speed and static stability. The properties of optimized  
 68 networks could then be more deeply analyzed.

69 The biomechanical exoskeleton of NeuroMechFly was obtained from a detailed CT-scan of an  
 70 adult female fly which was then digitally rendered. We defined the model’s leg degrees-of-freedom  
 71 based on an investigation of *Drosophila* 3D leg kinematics (Figure 1A), allowing us to discover that a  
 72 previously unreported coxa-trochanter leg degree-of-freedom (DoF) is required to accurately recapitu-

late real fly walking and grooming. Using this biomechanical exoskeleton and replaying experimental leg kinematics within the PyBullet physics-based simulation environment (Figure 1B) [42], we then explored how one can estimate quantities that cannot be experimentally measured in behaving flies—ground reaction forces (GRFs), joint torques, and tactile contacts. As a second use-case illustration of NeuroMechFly’s potential, we leveraged the full neuromechanical framework—now including neural and muscle models—to show how the parameters of a central pattern generator (CPG)-inspired coupled-oscillator network and associated torsional spring and damper muscle model could be optimized to discover and explore controllers for fast and stable walking (Figure 1C). Importantly, the NeuroMechFly framework is modular and open-source, enabling future extensions including the use of more detailed neural and muscle models that permit more interpretable experimental predictions that can inform our understanding of real *Drosophila* neural circuits. Thus, NeuroMechFly represents an important step towards comprehending how behaviors emerge from a complex interplay between neural dynamics, musculoskeletal biomechanics, and physical interactions with the environment.

## 2 Results

### 2.1 Constructing a data-driven biomechanical model of adult *Drosophila*

Behavior depends heavily on the body’s physical constraints and its interactions with the environment. Therefore, morphological realism is critical to accurately model leg movements and their associated self-collisions, joint ranges of motion, mass distributions, and mechanical loading. To achieve this level of realism in our model, we first measured the morphology of an adult female fly using x-ray microtomography (Video 1). We first embedded the animal in resin to reduce blurring associated with scanner movements (Figure 2A). Then we processed the resulting microtomography data (Figure 2B) by binarizing it to discriminate between foreground (fly) and background (Figure 2C). Finally, we applied a Lewiner marching cubes algorithm [43] to generate a polygon mesh 3D reconstruction of the animal’s exoskeleton (Figure 2D).

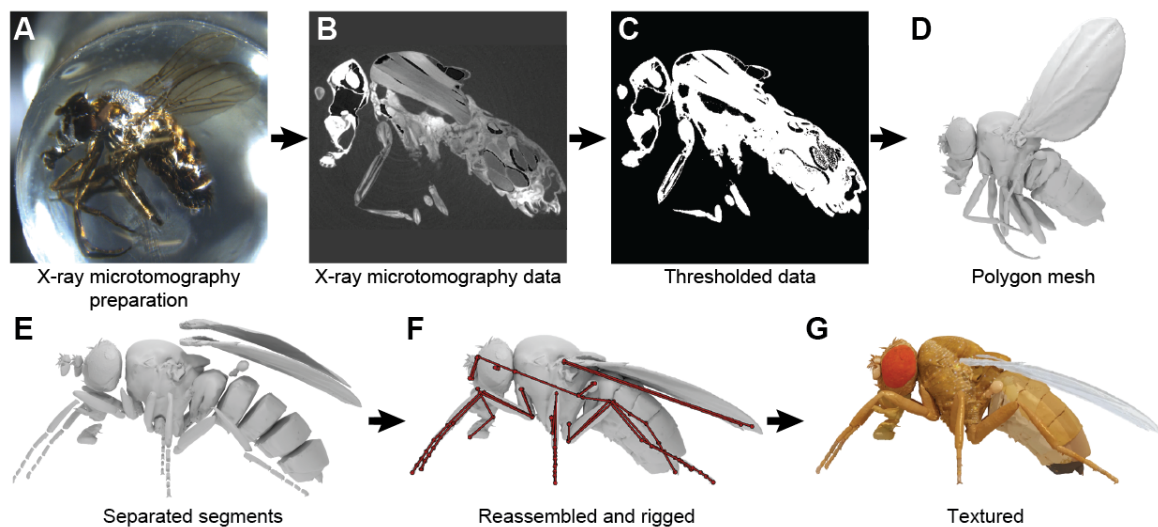

Figure 2: **Constructing a data-driven biomechanical model of adult *Drosophila*.** (A) An adult female fly is encased in resin for x-ray microtomography. (B) Cross-section of the resulting x-ray scan. Cuticle, muscles, nervous tissues, and internal organs are visible. (C) A threshold is applied to these data to separate the foreground (white) from the background (black). (D) A 3D polygon mesh of the exoskeleton and wings is constructed. (E) Articulated body parts are separated from one another. (F) These parts are reassembled into a natural resting pose. Joint locations are defined and constraints are introduced to create an articulated body (dark red). (G) Textures are added to improve the visual realism of the model.

Subsequently, to articulate appendages from this polygon mesh, we separated the body into 65 segments (see Table 1)(Figure 2E) and reassembled them into an empirically defined natural resting

109 pose. Joints were added manually to permit actuation of the antennae, proboscis, head, wings,  
110 halteres, abdominal segments, and leg segments. Leg articulation points were based on observations  
111 from high-resolution videography [33], and previously reported leg DoFs [44–46](Table 1)(Figure 2F).  
112 By measuring leg segment lengths across animals ( $n = 10$ ), we confirmed that the model’s legs are  
113 within the range of natural size variation (Figure S1).

114 To facilitate the control of each DoF in the physics engine, we used hinge-type joints to connect  
115 each of the body parts. We later show that this approximation permits accurate replay of leg end-  
116 effector trajectories. Therefore, to construct thorax-coxa joints with three DoFs, we combined three  
117 hinge joints along the yaw, pitch, and roll axes of the base link. Finally, we textured the model for  
118 visualization purposes (Figure 2G). This entire process yielded a rigged model of adult *Drosophila*  
119 with the morphological accuracy required for biomechanical studies as well as, in potential future  
120 work, model-based computer vision tasks like pose estimation [47–51].

## 121 2.2 Identifying minimal joint degrees-of-freedom required to accurately 122 replay real 3D leg kinematics

123 After constructing an articulating biomechanical model of an adult fly, we next asked whether the  
124 six reported and implemented leg DoFs—(i-iii) thorax-coxa (ThC) elevation/depression, protraction/  
125 retraction, and rotation, (iv) coxa-trochanter (CTr) flexion/extension, (v) femur-tibia (FTi)  
126 flexion/extension, and (vi) tibia-tarsus (TiTa) flexion/extension [44, 45]—would be sufficient to accu-  
127 rately replay measured 3D leg kinematics. We did not add a trochanter-femur (TrF) joint because  
128 the *Drosophila* trochanter is thought to be fused to the femur [45]. For the middle and hind legs, ThC  
129 protraction/retraction occurs along a different axis than similarly named movements of the front legs.  
130 Therefore, we chose to instead use the notations ‘roll’, ‘pitch’, and ‘yaw’ to refer to rotations around  
131 the anterior/posterior, medial/lateral, and dorsal/ventral axes of articulated segments, respectively  
132 (Video 2).

133 For our studies of leg kinematics, we focused on forward walking and grooming, two of the most  
134 common spontaneously-generated *Drosophila* behaviors. First, we used DeepFly3D [33] to acquire 3D  
135 poses from recordings of tethered flies behaving spontaneously on a spherical treadmill. Due to 3D  
136 pose estimation-related noise and some degree of inter-animal morphological variability (Figure S1),  
137 directly actuating NeuroMechFly using raw 3D poses was impossible. To overcome this issue, we  
138 fixed the positions of base ThC joints as stable reference points and set each body part’s length to its  
139 mean length for a given experiment. Then, we scaled relative ThC positions and body part lengths  
140 using our biomechanical model as a template. Thus, instead of using 3D cartesian coordinates, we  
141 could now calculate joint angles that were invariant across animals and that matched the DoFs used  
142 by NeuroMechFly. At first we calculated these joint angles for the six reported DoFs [44, 45] by  
143 computing the dot product between the global rotational axes and coxal joints and between adjacent  
144 leg segments joined by single-rotational joints (see Materials and Methods).

145 When only these six DoFs were used to replay walking and grooming, we consistently observed  
146 a large discrepancy between 3D pose-derived cartesian joint locations and those computed from  
147 joint angles via forward kinematics (Figure 3, Base DoF Dot product). Visualization of these errors  
148 showed significant out-of-plane movements of the tibia and tarsus (Video 3, top-left). This was  
149 surprising given that each leg is thought to consist of a ball-and-socket joint (three DoFs in the ThC  
150 joint) followed by a series of one DoF hinge joints that, based on their orientations, should result  
151 in leg segments distal to the coxa residing in the same plane. Therefore, we next tried to identify  
152 alternative leg configurations that might better match 3D poses. First we performed an inverse  
153 kinematics optimization of joint angles rather than dot product operations. This would allow us to  
154 identify angle configurations that minimize error at the most distal tip of the kinematic chain—in this  
155 case, the pretarsus. Although inverse kinematics yielded a lower discrepancy (Figure 3, Base DoF  
156 Inverse kinematics), we still observed consistent out-of-plane leg movements (Video 3, top-middle).

168 We next examined whether an extra DoF might be needed at the CTr joint to accurately replicate  
169 real fly leg movements. This analysis was motivated by the fact that: (i) other insects use addi-  
170 tional stabilizing rotations at or near the TrF joint [52–55], (ii) unlike other insects, the *Drosophila*  
171 trochanter and femur are fused, and (iii) *Drosophila* hosts reductor muscles of unknown function  
172 near the CTr joint [44]. To ensure that any improvements did not result simply from overfitting by  
173 increasing the number of DoFs, we also tested the effect of adding one roll or yaw DoF to each of the  
174 more distal hinge-type joints (CTr, FTi and TiTa)(Video 2). Indeed, for both walking (Video 3,

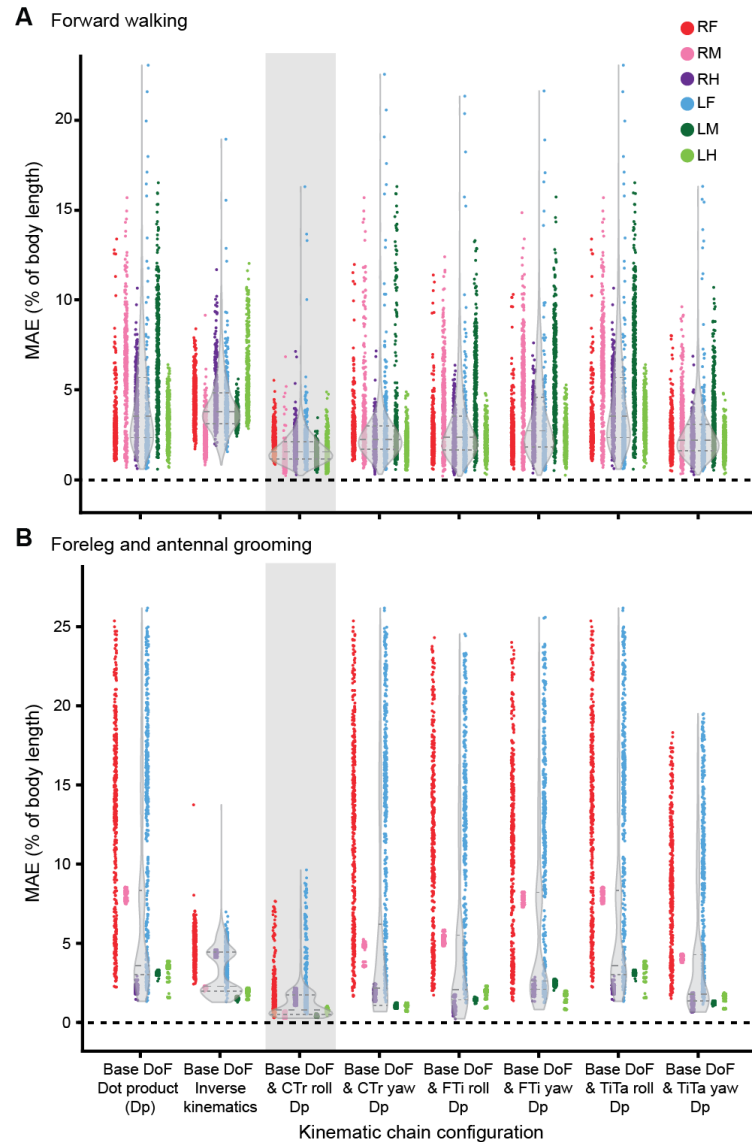

157

158 **Figure 3: Adding a CTr roll DoF to base DoFs enables the most accurate kinematic replay**  
 159 **of real walking and grooming.** Body-length normalized mean absolute errors (MAE) comparing  
 160 measured 3D poses and angle-derived joint positions for various DoF configurations. Measurements  
 161 were made for representative examples of (A) forward walking, or (B) foreleg/antennal grooming.  
 162 For each condition,  $n = 2400$  samples were computed for all six legs across 4 s of 100 Hz video data.  
 163 Data for each leg are color-coded. ‘R’ and ‘L’ indicate right and left legs, respectively. ‘F’, ‘M’,  
 164 and ‘H’ indicate front, middle, and hind legs, respectively. Violin plots indicate median, upper, and  
 165 lower quartiles (dashed lines). Results from adding a coxa-trochanter roll DoF to based DoFs are  
 166 highlighted in light gray.

175 top-right) and foreleg/antennal grooming (Video 4, top-right), we observed that adding a CTr roll  
 176 DoF to the six previously reported (‘base’) DoFs significantly and uniquely reduced the discrepancy  
 177 between 3D pose-derived and forward kinematics-derived joint positions, even when compared with  
 178 improvements from inverse kinematics (Figure 3, Base DoF & CTr roll; for statistical analysis, see  
 179 Table 2 and Table 3). This improvement was also evident on a joint-by-joint basis for walking (Fig-  
 180 ure S2) and grooming (Figure S3) and it was not achieved by any other kinematic chain tested—a  
 181 result that argues against the possibility of over-fitting (Figure 3, Base DoF & CTr yaw, Base DoF  
 182 & FTi roll, Base DoF & FTi yaw, Base DoF & TiTa roll, Base DoF & TiTa yaw). These findings  
 183 demonstrate that accurate kinematic replay of *Drosophila* leg movements requires seven DoFs per leg:

184 the previously reported six DoFs [44, 45] as well as a roll DoF near the CTr joint. Thus, by default,  
185 NeuroMechFly’s biomechanical exoskeleton incorporates this additional DoF for each leg (Table 1).

### 186 2.3 Using NeuroMechFly to estimate joint torques and contact forces 187 through kinematic replay of real fly behaviors

188 Having identified a suitable set of leg DoFs, we next aimed to illustrate the utility of NeuroMechFly  
189 as a biomechanical model within the PyBullet physics-based environment. PyBullet is an integrative  
190 framework that not only gives access to collisions, reaction forces, and torques but also imposes gravity,  
191 time, friction, and other morphological collision constraints, allowing one to explore their respective  
192 roles in observed animal behaviors. Specifically, we focused on testing the extent to which one might  
193 use kinematic replay of real behaviors to infer torques, and contact forces like body part collisions and  
194 ground reaction forces (GRFs)—quantities that remain technically challenging to measure in small  
195 insects like *Drosophila* [18, 56]. Although kinematic replay may not provide information about internal  
196 forces that are not reflected in 3D poses (e.g., how tightly the legs grip the spherical treadmill without  
197 changes in posture), estimates of collisions and interaction forces may be a good first approximation  
198 of an animal’s proprioception and mechanosensation.

199 We explored this possibility by using a proportional-derivative (PD) controller implemented in  
200 PyBullet to actuate the model’s leg joints, replaying measured leg kinematics during forward walking  
201 and foreleg/antennal grooming. We used joint angles and angular velocities as target signals for  
202 the controller. Because, when applying this kind of controller, there is no unique set of contact  
203 solutions that match forces and torques to prescribed kinematics (i.e., experimental validation of  
204 force estimates would ultimately be necessary), we first quantified how sensitive torque and force  
205 estimates were to changes in PD controller gains. Based on this sensitivity analysis, we selected gain  
206 values that optimized the precision of kinematic replay (Figure S4, blue squares) and for which small  
207 deviations did not result in large variations in measured physical quantities (Figure S5, red traces).  
208 We included all seven leg degrees-of-freedom from our error analysis (Figure S6) and the model’s  
209 ‘zero-angle pose’ was selected to make joint angles intuitive (Figure S7). We also set fixed values for  
210 the orientation of abdominal segments, wings, halteres, head, proboscis, and antennae to generate a  
211 natural pose (Table 4).

212 When we replayed walking (Figure 4A-C)(Video 5) and foreleg/antennal grooming (Figure 5A-  
213 C) (Video 6), we observed that the model’s leg movements were largely identical to those measured  
214 from *Drosophila*. By measuring real ball rotations [57] and comparing them with simulated spherical  
215 treadmill rotations, for a range of soft constraint parameters (Figure S8), we quantified high similarity  
216 between real and simulated spherical treadmill forward velocities (Figure S9D), and to some extent,  
217 yaw velocities (Figure S9F). Sideways velocities were smaller and, thus, difficult to compare (Fig-  
218 ure S9E). This was notable given that the ball’s rotations were not explicitly controlled but emerged  
219 from tarsal contacts and forces in our simulation. These observations support the accuracy of our  
220 computational pipeline in processing and replaying recorded joint positions.

221 Next, we more directly validated collisions and forces computed within the PyBullet physics-based  
222 simulation environment. From kinematic replay of joint angles during walking (Figure 4E, top), we  
223 measured rich, periodic torque dynamics (Figure 4E, middle). These were accompanied by ground  
224 reaction forces (GRFs) that closely tracked subtle differences in leg placement across walking cycles  
225 (Figure 4E, bottom). Superimposing these GRF vectors on raw video recordings of the fly allowed  
226 us to visualize expected tarsal forces (Figure 4D)(Video 5, top-left) which could also be used to  
227 generate predicted gait diagrams during tethered walking (Figure 4F). These predictions were highly  
228 accurate (83.5 - 87.3% overlap) when compared with manually labeled ground-truth gait diagrams for  
229 three different animals and experiments (Figure S10). This result was notable given that the thorax  
230 is fixed and, in principle, subtle changes in attachment height could increase or decrease the duration  
231 of leg-treadmill contacts.

232 Similarly, for foreleg/antennal grooming (Figure 5A-C), we observed that measured joint angles  
233 (Figure 5E, top) could give rise to complex torque dynamics (Figure 5E, middle). Associated leg  
234 and antennal contact forces (Figure 5D, E, bottom) reached magnitudes about three times the fly’s  
235 weight. These fall within the range of previously observed maximum forces measured at the tip of the  
236 tibia ( $\sim 100\mu N$ ) for ballistic movements [58], but further experimental data will be required to fully  
237 validate these measurements. These leg and antennal contact forces were used to generate groom-  
238 ing diagrams—akin to locomotor gait diagrams—that illustrate predicted contacts between distal leg

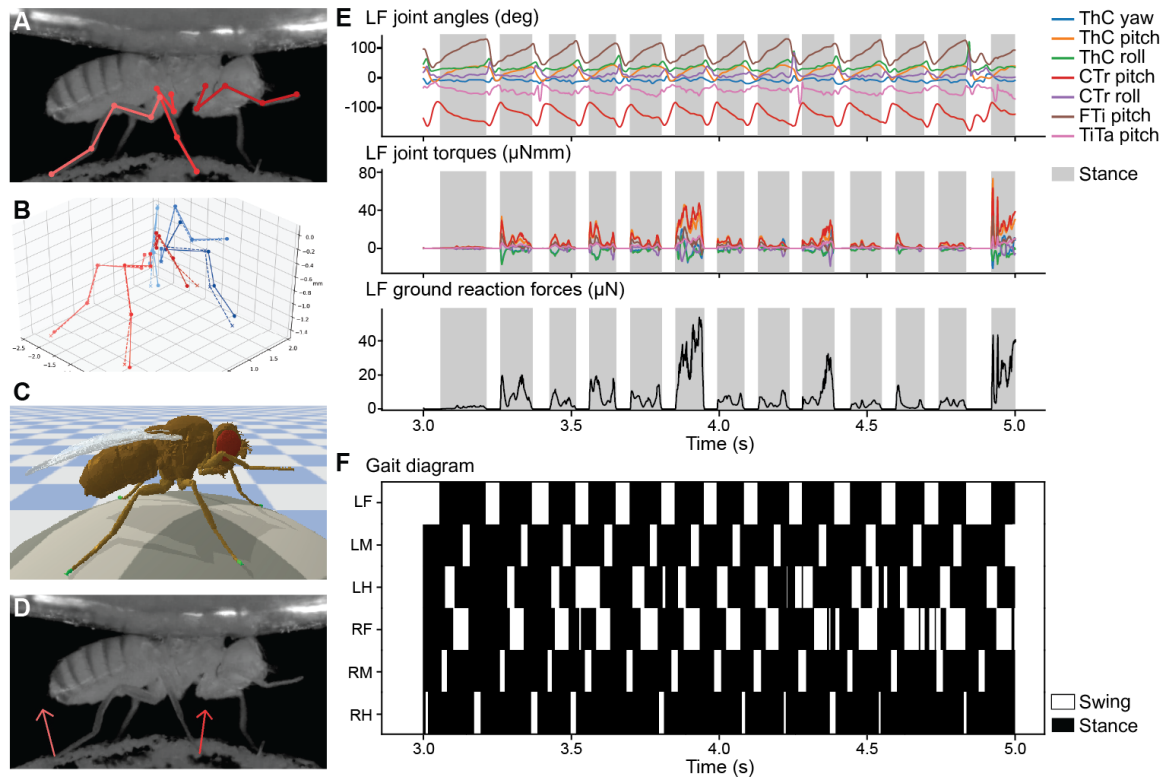

212

213 **Figure 4: Kinematic replay of forward walking allows the estimation of ground contacts**  
 214 **and reaction forces.** (A) Multiple cameras and deep learning-based 2D pose estimation are used  
 215 to track the positions of each leg joint while a tethered fly is walking on a spherical treadmill. (B)  
 216 Multiview 2D poses (solid lines) are triangulated and processed to obtain 3D joint positions (dashed  
 217 lines). These are further processed to compute joint angles for seven DoFs per leg. (C) Joint  
 218 angles are replayed using PD control in NeuroMechFly. Body segments in contact with the ground  
 219 are indicated (green). (D) Estimated ground reaction force vectors (red arrows) are superimposed  
 220 on original video data. (E, top) Kinematic replay of real 3D joint angles permits estimation of  
 221 unmeasured (E, middle) joint torques, and (E, bottom) ground reaction forces. Only data for  
 222 the left front leg (LF) are shown. Grey bars indicate stance phases when the leg is in contact with  
 223 the ground. Joint DoFs are color-coded. (F) A gait diagram illustrating stance (black) and swing  
 224 (white) phases for each leg as computed by measuring simulated tarsal contacts with the ground.

253 segments and the antennae (Figure 5F). During leg-leg grooming, we observed collisions that moved  
 254 continuously along the leg segments in proximal to distal sweeps. These collision data provide a richer  
 255 description of grooming beyond classifying the body part that is being cleaned and can enable a more  
 256 precise physical quantification of many other behaviors including, for example, inter-animal boxing or  
 257 courtship tapping. This approach also revealed the importance of having a morphologically accurate  
 258 biomechanical model. When we replaced our CT scan-based leg segments and antennae with more  
 259 conventional stick segments having similar diameters and lengths, we observed less rich collision dy-  
 260 namics including the elimination of interactions between the tarsi and antennae (Figure S11) (Video  
 261 7).

277 Because our 3D pose estimates were made on a tethered fly behaving on a spherical treadmill,  
 278 we also ‘tethered’ our simulation by fixing the thorax position. Next, we asked to what extent  
 279 our model might be able to walk without body support (i.e., keeping its balance while carrying  
 280 its body weight). To do this, we replayed 3D kinematics from tethered walking (Figure 4)(Video  
 281 5) while NeuroMechFly could walk freely (untethered) on flat terrain. Indeed, we observed that  
 282 our model walked stably on the ground (Video 8). Although an animal’s legs would naturally  
 283 be positioned differently on a curved versus a flat surface, the flexibility of NeuroMechFly’s tarsal  
 284 segments allowed it to walk freely with a natural pose using 3D poses taken from tethered walking on  
 285 a curved spherical treadmill. As expected, flat ground locomotion matched the velocities of tethered

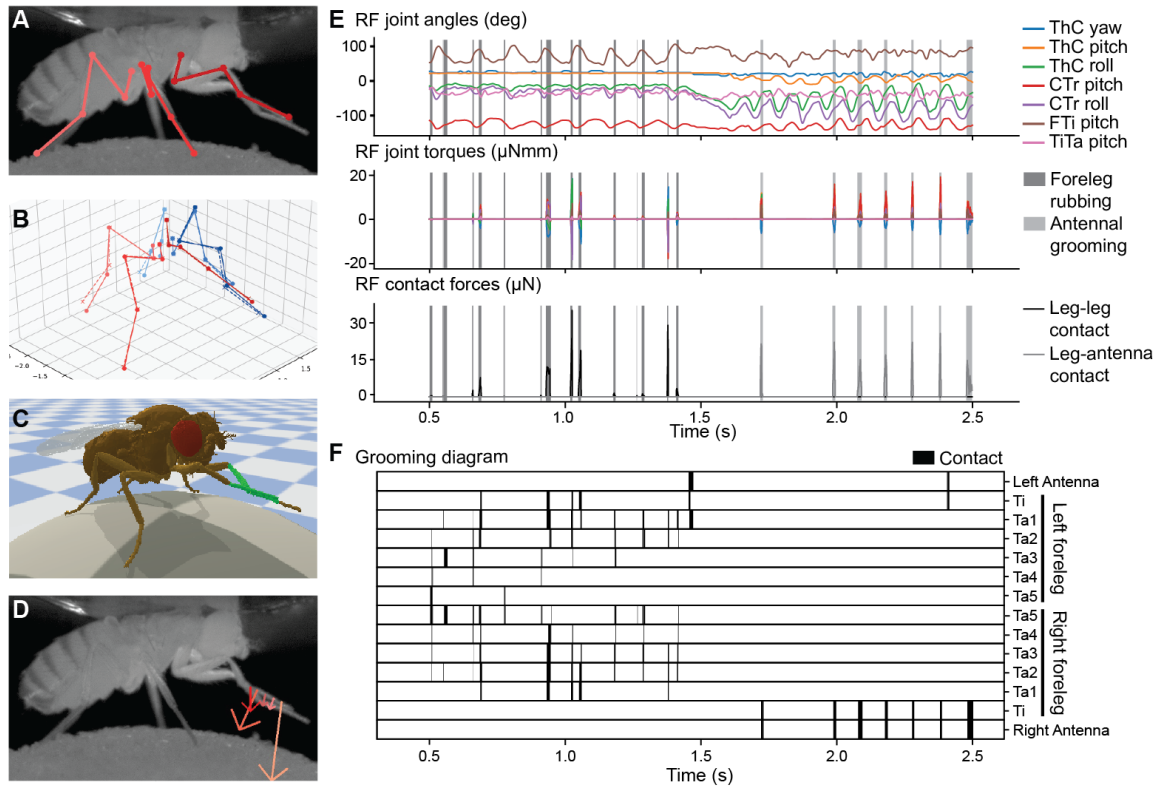

262

263 **Figure 5: Kinematic replay allows the estimation of self-collisions and reaction forces**  
 264 **during foreleg/antennal grooming.** (A) Multiple cameras and deep learning-based 2D pose  
 265 estimation are used to track the positions of each leg joint while a tethered fly grooms its forelegs  
 266 and antennae. (B) Multiview 2D poses (solid lines) are triangulated and processed to obtain 3D  
 267 joint positions (dashed lines). These are further processed to compute joint angles for seven DoFs per  
 268 leg. (C) Joint angles are replayed using PD control in NeuroMechFly. Body segments undergoing  
 269 collisions are indicated (green). (D) Estimated leg-leg and leg-antennae contact forces (red arrows)  
 270 are superimposed on original video data. (E, top) Kinematic replay of real joint angles permits  
 271 estimations of unmeasured (E, middle) joint torques, and (E, bottom) contact forces. Only data  
 272 for the right front (RF) leg are shown. Dark grey bars indicate leg-leg contacts. Light grey bars  
 273 indicate leg-antenna contacts. Joints are color-coded. (F) A grooming diagram illustrating contacts  
 274 (black) made by the front leg's five tarsal segments ('Ta1' and 'Ta5' being the most proximal and the  
 275 most distal, respectively), tibia ('Ti'), and both antennae ('Ant').

286 walking (Figure S12) better than walking paths (Video 8): small deviations in heading direction  
 287 yield large changes in trajectories.

288 In summary, we have shown how NeuroMechFly's biomechanical exoskeleton—without muscle  
 289 or neuron models—can be used to replay real 3D poses to estimate otherwise inaccessible physical  
 290 quantities like joint torques, collisions, and reaction forces that are accessible from its physics-based  
 291 simulation engine.

## 292 2.4 Using NeuroMechFly to explore locomotor controllers by optimizing 293 CPG-oscillator networks and muscles

294 As a full neuromechanical model, NeuroMechFly consists not only of biomechanical elements, like  
 295 those used for kinematic replay, but also neuromuscular elements. In our computational framework,  
 296 these represent additional modules that the investigator can define to be more abstract—e.g., leaky  
 297 integrate-and-fire neurons and spring-and-damper models—or more detailed—e.g., Hodgkin-Huxley  
 298 neurons and Hill-type muscle models. Parameters for neural networks and muscles that maximize  
 299 user-defined objectives and minimize penalties can be identified using evolutionary optimization.

300 Here, to provide a proof-of-concept of this approach, we aimed to discover neuromuscular con-



301 trollers that optimize fast and statically stable tethered walking. Insect walking gaits are commonly  
 302 thought to emerge from the connectivity and dynamics of networks of CPGs within the ventral nerve  
 303 cord (VNC) [15, 16, 59, 60]. Although alternative, decentralized approaches have also been pro-  
 304 posed [14, 61], we focused on exploring a CPG-based model of locomotor control. First, we designed  
 305 a neural network controller consisting of a CPG-like coupled oscillator [62] for each joint (Figure 6A).  
 306 For simplicity, we denote the output of each coupled oscillator as the activity of a CPG. These CPGs,  
 307 in turn, were connected to spring-and-damper ('Ekeberg-type') muscles [63]. This simple muscle  
 308 model has been used to effectively simulate lamprey [63], stick insect [11], and salamander [9]  
 309 locomotion.

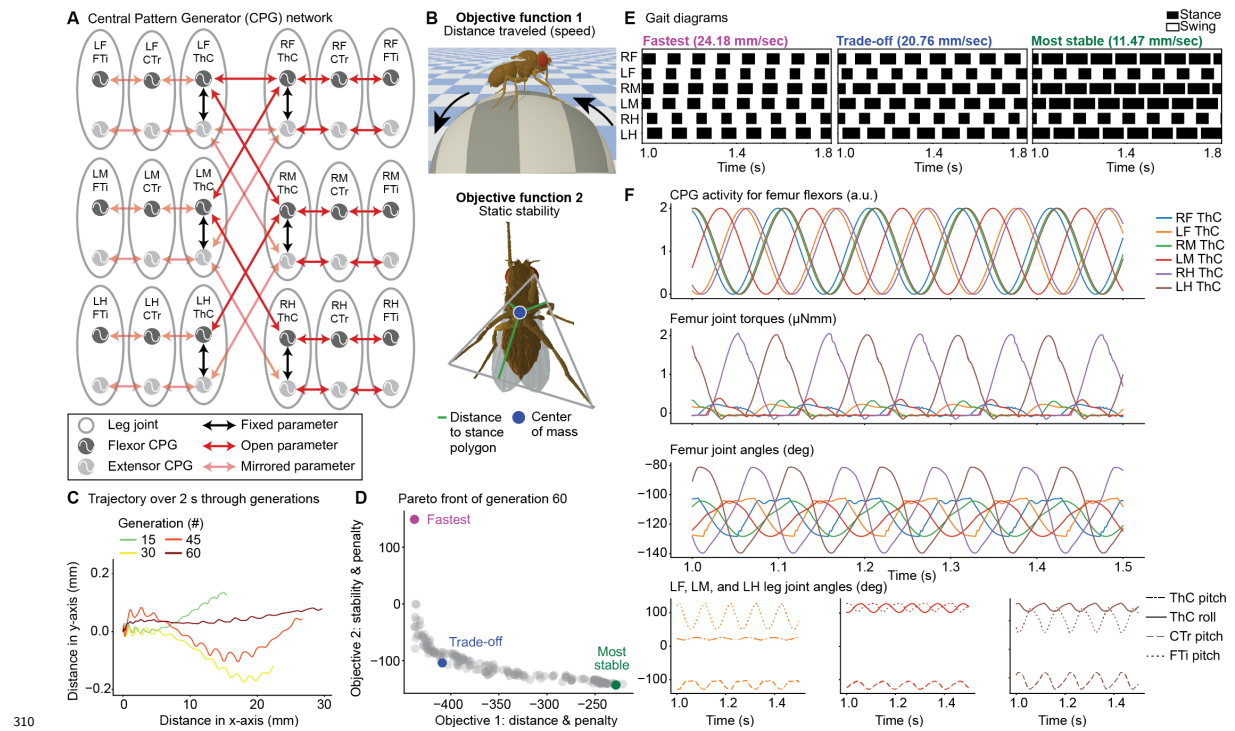

311 **Figure 6: Using evolutionary optimization to identify oscillator network and muscle pa-**  
 312 **rameters that achieve fast and stable locomotion.** (A) A network of coupled oscillators  
 313 modeling CPG-based intra- and interleg circuits in the ventral nerve cord of *Drosophila*. Oscillator  
 314 pairs control specific antagonistic leg DoFs (gray). Network parameter values are either fixed (black),  
 315 modified during optimization (red), or mirrored from oscillators on the other side of the body (pink).  
 316 (B) Multi-objective optimization of network and muscle parameters maximizes forward walking distance  
 317 traveled (speed) and static stability. (C) A 'trade-off' solution's locomotor trajectory (distance  
 318 traveled over x and y axes) across 60 optimization generations. (D) Pareto front of solutions from  
 319 the final (60th) optimization generation. Three individuals were selected from the population using  
 320 different criteria: the longest distance traveled (fastest, purple), the most statically stable solution  
 321 ('most stable', green), and the solution having the smallest 2-norm of both objective functions after  
 322 normalization (trade-off). (E) Gait diagrams for selected solutions from generation 60. Stance (black)  
 323 and swing (white) phases were determined based on tarsal ground contacts for each leg. Velocity val-  
 324 ues were obtained by averaging the ball's forward velocity over 2 s. (F) Central Pattern Generator  
 325 (CPG) outputs, joint torques, and joint angles of each leg's femur for the 'trade-off' solution. Intraleg  
 326 joint angles for the left front, middle, and hind legs are also shown. Legs are color-coded and joints  
 327 are shown in different line styles.

329 We aimed to identify suitable neuromuscular parameters for walking in an reasonably short period  
 330 of optimization time (less than 24 h per run on a workstation). Therefore, we reduced the number  
 331 of parameters and, thus, the search space. Specifically, we limited controlled DoFs to those which (i)  
 332 were sufficient to generate walking in other insect simulations [64] and (ii) had the most pronounced  
 333 effect on overall leg trajectories in our kinematic analysis of real flies (Figure S13). Thus, we used  
 334 the following three DoFs per leg that satisfied these criteria: CTr pitch, and FTi pitch for all legs as

335 well as ThC pitch for the forelegs and ThC roll for the middle and hind legs.

336 Each DoF was controlled by two coupled CPGs that drove the extensor and antagonistic flexor  
337 muscles. We assumed left-right body symmetry and optimized intraleg joint phase differences and  
338 muscle parameters for the right legs, mirroring these results for the left legs. In the same manner,  
339 we optimized the phase differences between the coxae flexor CPGs and mirrored them for the coxae  
340 extensor CPGs. Thus, we could connect 36 coupled oscillators in a minimal configuration to remove  
341 redundancy and reduce the optimization search space (Figure 6A). Finally, to permit a wide range  
342 of joint movements, each CPG's intrinsic frequency was set as an open parameter, whose limits  
343 were constrained to biologically relevant frequencies observed from real fly joint movements during  
344 walking [28, 65](Figure S13). In total, 63 open parameters were optimized including CPG intrinsic  
345 frequencies, CPG phase differences, and muscle parameters (see Materials and Methods).

346 We performed multi-objective optimization [66] using the NSGA-II genetic algorithm [67] to  
347 identify neuromuscular parameters that drove walking gaits satisfying two high-level objective func-  
348 tions: forward speed and static stability. Notably, these objectives can be inversely correlated: fast  
349 walking might be achieved by minimizing stance duration and reducing static stability. Forward speed  
350 was defined as the number of backward ball rotations within a fixed period of time and quantified  
351 as fictive distance traveled (Figure 6B, top). Static stability refers to the stability of an animal's  
352 given pose if, hypothetically, tested while immobile. This metric can be quantified during walking as  
353 the minimal distance between the model's center-of-mass (COM) and the closest edge of the support  
354 polygon formed by the legs in stance phase (i.e., in contact with the ground). This means that the  
355 closer the COM is to the center of the support polygon, the higher the static stability score. (Fig-  
356 ure 6B, bottom). Additionally, we defined four penalties to discourage unrealistic solutions including  
357 those with excessive joint velocities (these cause jittering or muscle instability), speeds slower or faster  
358 than real locomotion (a 'moving boundary'), as well as joint angle ranges of motion and duty factors  
359 that violate those observed in real flies. Because the optimizer minimizes the objective functions, we  
360 inverted the sign for both functions. Thus, during optimization the Pareto front of best solutions  
361 evolved toward more negative values (Figure S14A) and forward walking speeds became faster over  
362 generations (Figure 6C)(Video 9).

363 To more deeply investigate our optimization results, we examined three individual solutions from  
364 the final generation. These were: (i) the fastest solution, (ii) the most stable solution, and (iii) a  
365 'trade-off' solution that was the best compromise between speed and static stability (see Methods for a  
366 precise mathematical definition) (Figure 6D). By generating gait diagrams for each of these solutions,  
367 we found a diversity of strategies—non-tripod gaits were observed in all generations (Figure S14B)  
368 even after objectives were maximized and penalties minimized at generation 60 (Figure S14C). How-  
369 ever, the trade-off solution—a compromise between speed and static stability—closely resembled a  
370 typical insect tripod gait [28, 68], supporting the notion that tripod locomotion satisfies a need for  
371 stability during fast insect walking [24].

372 Because NeuroMechFly provides access to neuromuscular dynamics and physical interactions,  
373 we could also analyze then further analyze how these underlying quantities give rise to optimized  
374 locomotor gaits. To illustrate this, we focused on the femur flexors of each leg for the 'trade-off'  
375 solution (Figure 6F). As expected for a tripod gait, stance and swing phases of the left front (LF)  
376 and hind (LH) legs were coordinated with those of the right middle (RM) leg. This coordination  
377 implies that the middle and hind legs CPG activities (Figure 6F, top, green and brown) are in phase  
378 with each other and phase shifted by  $180^\circ$  with respect to the front leg (Figure 6F, top, orange). This  
379 is because, during stance phases, the front legs flex while the middle and hind legs extend. However,  
380 for the tripod generated by other three legs, the CPG activity of the left, middle (LM) femur was  
381 phase shifted with respect to the right front (RF) and hind (RH) legs (Figure 6F, top, red). Torques  
382 were highest for the hind legs, suggesting an important role for driving ball rotations (Figure 6F,  
383 middle, purple and brown). Finally, we confirmed that the increased torque of the hind legs was  
384 associated with a larger range of motion as measured by joint angles (Figure 6F, bottom).

385 These results illustrate how, by combining our biomechanical exoskeleton with neuromuscular  
386 elements and an optimization framework, we could discover control strategies that maximize high-  
387 level behavioral objectives and minimize penalties informed by real measurements of *Drosophila*.  
388 For these solutions, neuromuscular dynamics, collisions, and forces could then be further examined  
389 because of their instantiation within a physics-based simulation environment.

### 3 Discussion

Here we have introduced NeuroMechFly, a computational model of adult *Drosophila* that can be used for biomechanical, and—by also including available neural and muscle models—neuromechanical studies. We first illustrated a biomechanical use case in which one can estimate joint torques and contact forces including ground-reaction forces and body part collisions by replaying real, measured fly walking and grooming. In the future, directly through force measurements [69, 70] or indirectly through recordings of proprioceptive and tactile neurons [38, 71], these estimates might be further validated. Next, we demonstrated a neuromechanical use case by showing how high-level optimization of a neural network and muscles could be used to discover and more deeply study locomotor controllers. Although here we optimized for speed and static stability during tethered locomotion, NeuroMechFly can also locomote without body support, opening up the possibility of optimizing neuromuscular controllers for diverse, untethered behaviors.

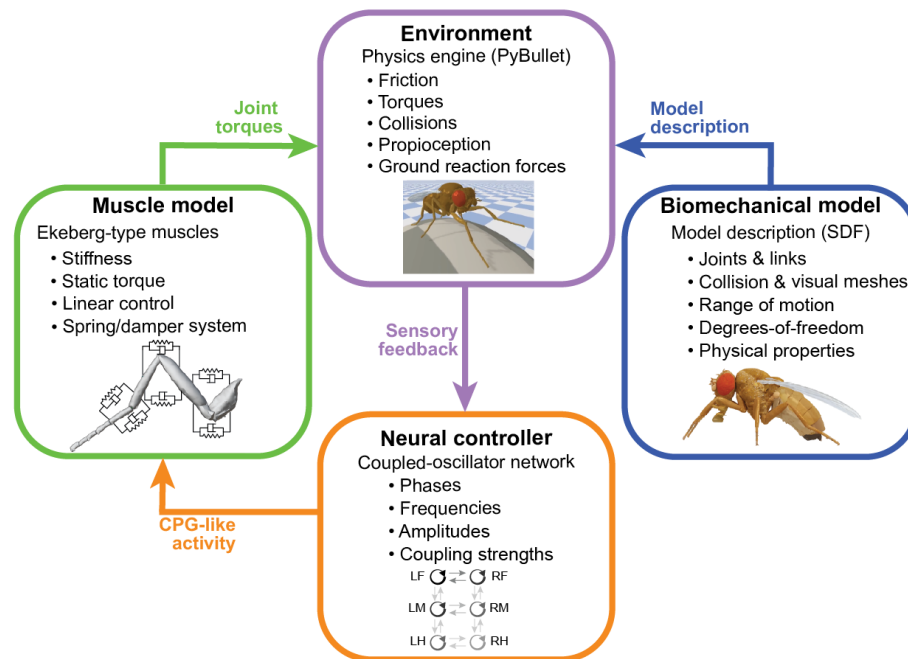

Figure 7: **Modules that can be independently modified in NeuroMechFly.** A neural controller’s output drives muscles to move a biomechanical model in a physics-based environment. Each of these modules can be independently modified or replaced within the NeuroMechFly simulation framework. The controller generates neural-like activity to drive muscles. These muscles produce torques to operate a biomechanical model embedded in PyBullet’s physics-based environment. When replacing any module it is only necessary to preserve the inputs and outputs (colored arrows).

#### 3.1 Limitations and future extensions of the biomechanical module

The biomechanical exoskeleton of NeuroMechFly can benefit from several near-term extensions by the community. First, actuation is currently only implemented for leg joints. Additional effort will be required to actuate other body parts including the head, or abdomen by defining their DoFs, joint angle ranges and velocities based on 3D pose measurements. Second, the model currently achieves compliant joints during kinematic replay through position control (akin to a spring-and-damper) in PyBullet. However, future work may include implementing compliant joints with stiffness and damping based on measurements from real flies. Third, NeuroMechFly employs rigid bodies that do not reflect the flexibility of insect cuticle. Although our modeling framework could potentially include soft-bodied elements—these are supported by the underlying physics engine—we have chosen not to because it would first require challenging measurements of cuticular responses to mechanical stresses and strains (i.e. Young’s modulus) [72,73], and this would increase the model’s computational complexity, making it less amenable to evolutionary optimization. NeuroMechFly currently supports

423 flexibility in terms of compliance because the muscle model includes stiffness and damping terms.  
424 Additionally, the fact that kinematic replay is already accurate—with similar real and simulated joint  
425 angle and end-effector positions—suggests that modeling additional cuticular deformations might only  
426 have negligible effects. Therefore, we currently offer what we believe to be a practical balance between  
427 accuracy and computational cost. Finally, future iterations of our biomechanical model might also  
428 include forces that are observed at small scales, including Van der Waals and attractive capillary  
429 forces of footpad hairs [74].

### 430 3.2 Limitations and future extensions of the neuromuscular modules

431 In addition to its biomechanical exoskeleton, NeuroMechFly includes modules for neural controllers,  
432 muscle models, and the physical environment (Figure 7). These interact with one another to gen-  
433 erate rich *in silico* motor behaviors. Each of these modules can be independently modified in fu-  
434 ture work to improve biological interpretability, computational efficiency, and increase the range of  
435 possible experiments. First, more detailed neural controllers could already be implemented includ-  
436 ing Integrate-and-Fire, or Hodgkin-Huxley type neurons [15]. This would aid in the comparison  
437 of discovered artificial neural networks and their dynamics with measured connectomes [40, 41] and  
438 functional recordings [38], respectively. Second, to increase the realism of movement control, Hill-  
439 type muscle models that have nonlinear force generation properties could be implemented based on  
440 species-specific muscle properties—slack tendon lengths, attachment points, maximum forces, and  
441 pennation angles [58, 75]. Third, to study more complex motor tasks, one can already use the Py-  
442 Bullet framework [42] to increase the complexity of the physical environment. For example, one can  
443 study locomotor stability by introducing external objects (Video 10), or locomotor strategies for  
444 navigating heightfield terrains.

445 In the near-term, we envision that NeuroMechFly will be used to test theories for neuromechanical  
446 behavioral control. For example, one might investigate the respective roles of feedforward versus  
447 feedback mechanisms in movement control (i.e., to what extent movements are generated by central  
448 versus sensory-driven signals). This can be tested by systematically modifying coupling strengths  
449 and sensory feedback gains in the simulation. Outcomes may then be experimentally validated. In  
450 the longer-term, this modeling framework might also be used in closed-loop with ongoing neural and  
451 behavioral measurements. Real-time 3D poses might be replayed through NeuroMechFly to predict  
452 joint torques and contact forces. These leg state predictions might then inform the delivery of pertur-  
453 bations to study how proprioceptive or tactile feedback are used to achieve robust movement control.  
454 In summary, NeuroMechFly promises to accelerate the investigation of how passive biomechanics  
455 and active neuromuscular control orchestrate animal behavior, and can serve as a bridge linking  
456 fundamental biological discoveries to applications in artificial intelligence and robotics.

## 4 Materials and Methods

### 4.1 Constructing an adult *Drosophila* biomechanical model

#### 4.1.1 Preparing adult flies for x-ray microtomography

The protocol used to prepare flies for microtomography was designed to avoid distorting the exoskeleton. We observed that traditional approaches for preparing insects for either archival purposes or for high resolution microscopy, including scanning electron microscopy [76], result in the partial collapse or bending of some leg segments and dents in the exoskeleton of the thorax and abdomen. These alterations mostly occur during the drying phase and while removal of ethanol by using supercritical carbon dioxide drying reduces these somewhat, it is still not satisfactory. We therefore removed this step altogether, and instead embedded flies in a transparent resin. This resulted in only a small surface artifact over the dorsal abdominal segments A1, A2, and A3.

Flies were heavily anaesthetized with CO<sub>2</sub> gas, then carefully immersed in a solution of 2% paraformaldehyde in phosphate buffer (0.1M, pH 7.4) containing 0.1% Triton 100, to ensure fixative penetration, and left for 24 h at 4°C. Care was taken to ensure the flies did not float on the surface, but remained just below the meniscus. They were then washed in 0.1M cacodylate buffer (2 x 3 min washes), and placed in 1% osmium tetroxide in 0.1M cacodylate buffer, and left at 4°C for an additional 24 h. Flies were then washed in distilled water and dehydrated in 70% ethanol for 48 h, followed by 100% ethanol for 72 h, before being infiltrated with 100% LR White acrylic resin (Electron Microscopy Sciences, US) for 24 h at room temperature. This was polymerised for 24 h at 60°C inside a closed gelatin capsule (size 1; Electron Microscopy Sciences) half-filled with previously hardened resin to ensure the insect was situated in the center of the final resin block, and away from the side.

#### 4.1.2 X-ray microtomography

We glued the sample onto a small carbon pillar and scanned it using a 160 kV open type, microfocus X-ray source (L10711/-01; Hamamatsu Photonics K.K., Japan). The X-ray voltage was set to 40 kV and the current was set to 112 uA. The voxel size was 0.00327683 mm. To perform the reconstruction, we used X-Act software from the microtomography system developer (RX-solutions, Chavanod, France) obtaining a stack of 982 tiff images of 1046x1636 pixels each.

#### 4.1.3 Building a polygonal mesh volume from processed microtomography data

First, we isolated cuticle and wings from the microtomography data using Fiji [77]. We selected 360 images from the tiff stack as the region of interest (ROI) beginning at slice 300. The tiff stack with the ROI was then duplicated. The first copy was binarized using a threshold value of 64 to isolate the cuticle. The second copy was cropped to keep the upper half of the image—where the wings are—and then binarized using a lower threshold value of 58. Finally, we applied a closing morphological operation to isolate the wings. Both binarized stacks were stored as tiff files.

We developed custom Python code to read the tiff stacks, and to fill empty holes within the body and wings. Finally, we used the Lewiner marching cubes algorithm [43] (implemented in the scikit-image package [78]) to obtain a polygon mesh for each stack. Both meshes were then exported to a standard compressed mesh storage format.

#### 4.1.4 Separating and reassembling articulated body parts

We used Blender (Foundation version 2.81 [79]) to clean and manipulate polygon meshes obtained from microtomography data.

After importing these meshes into Blender, we removed noise by selecting all vertices linked to the main body (or wings), inverting the selection, and deleting these vertices. We explored the resulting meshes, looking for spurious features, and then manually selected and deleted the related vertices. We obtained 65 body segments (Table 1) based on [80]. More recent literature corroborated these propositions for body morphology and joint degrees-of-freedom. We manually selected and deleted vertices from our imported 3D body and wing models. Segments were then separated at joint locations based on published morphological studies. We made some simplifications. Most notably,

506 in the antennae, we considered only one segment instead of three because cutting this small element  
507 into a few pieces would alter its morphology.

508 Each wing was separated into an individual segment from the wing model. The body model  
509 was separated into 63 segments as described below. The abdomen was divided into five segments  
510 according to tergite divisions. The first and second tergites were combined as the first segment  
511 (A1A2), and the last segment (A6) included the sixth to tenth tergites. Each antenna was considered  
512 a single segment and separated from the head capsule at the antennal foramen. Both eyes and the  
513 proboscis were separated from the head. The latter was divided into two parts, the first containing  
514 the rostrum (Rostrum), and the second containing the haustellum and labellum (Haustellum). Each  
515 leg was divided in eight parts: the coxa, trochanter/femur, tibia, and five tarsal segments. The thorax  
516 was considered a single segment and only the halteres were separated from it.

517 Each segment was processed in Blender to obtain closed meshes. First, a remesh modifier was used  
518 in ‘smooth mode’, with an octree depth of 8, and a scale of 0.9 to close the gaps generated in the meshes  
519 after been separated from the original model. Smooth shading was enabled and all disconnected  
520 pieces were removed. Then, we used ‘sculpt mode’ to manually compensate for depressions/collapses  
521 resulting from the microtomography preparation, or from separating body segments.

522 Then, all segments were copied into a single \*.blend file and rearranged into a natural resting pose  
523 (Figure 2F). We made the model symmetric to avoid inertial differences between contralateral legs  
524 and body parts. For this, we used the more detailed microtomography data containing the right side  
525 of the fly. First, the model was split along the longitudinal plane using the bisect tool. Then the left  
526 side was eliminated and the right side was duplicated and mirrored. Finally, the mirrored half was  
527 repositioned as the left side of the model, and both sides of the head capsule, rostrum, haustellum,  
528 thorax, and abdominal segments were joined.

529 At this point, the model consisted of approximately nine million vertices, an intractable number  
530 for commonly used simulators. We therefore used the decimate tool to simplify the mesh and collapse  
531 its edges at a ratio of 1% for every segment. This resulted in a model with 87,000 vertices that  
532 conserved the most important details but eliminated small bristles and cuticular textures.

#### 533 4.1.5 Rigging the Blender model

534 We added an Armature object alongside our model to build the skeleton of the fly. To actuate the  
535 model, we created a ‘bone’—a tool in Blender that is used to animate characters—for each segment.  
536 Bones were created such that the thorax would be the root of the skeleton and each bone would  
537 be the child of its proximal bone, as indicated in Table 1. Then, the bones were positioned along  
538 the longitudinal axis of each segment with their heads and tails over the proximal and distal joints,  
539 respectively. Each joint was positioned at a location between neighboring segments. Each bone  
540 inherited the name of its corresponding mesh.

541 We used the Custom Properties feature in Blender to modify the properties of each bone. These  
542 properties can be used later in a simulator to e.g., define the maximum velocity, or maximum effort of  
543 each link. Furthermore, we added a limit rotation constraint (range of motion) to each axis of rotation  
544 (DoF) for every bone. The range of motion for each rotation axis per joint was defined as  $-180^\circ$  to  
545  $180^\circ$  to achieve more biorealistic movements. Because, to the best of our knowledge, there are no  
546 reported angles for these variables, these ranges of motion should be further refined once relevant  
547 data become available. The DoF of each bone (segment) were based on previous studies [44, 81, 82]  
548 (see Table 1). Any bone can be rotated in Blender to observe the constraints imposed upon each axis  
549 of rotation. These axes are defined locally for each bone.

550 Finally, we defined a ‘zero-position’ for our model. Most bones were positioned in the direction  
551 of an axis of rotation (Figure S7). Each leg segment and the proboscis were positioned along the  $Z$   
552 axis. Each abdominal segment and the labellum were positioned along the  $X$  axis. Wings, eyes, and  
553 halteres were positioned along the  $Y$  axis. The head and the antennae are the only bones not along  
554 a rotational axis: the head is rotated  $20^\circ$  along the  $Y$  axis, and the antennae are rotated  $90^\circ$  with  
555 respect to the head bone. Positioning the bones along axes of rotation makes it easier to intuit a  
556 segment’s position with its angular information and also more effectively standardizes the direction  
557 of movements.

#### 558 **4.1.6 Exporting the Blender model into the Bullet simulation engine**

559 We used a custom Python script in Blender to obtain the name, location, global rotation axis, range  
560 of motion, and custom properties for each bone. As mentioned above, the axes of rotation are defined  
561 locally for each bone. Therefore, our code also transforms this information from a local to a global  
562 reference system, obtaining the rotation matrix for each bone.

563 We used the Simulation Description Format (SDF, <http://sdformat.org/>) convention to store  
564 the model's information. This format consists of an \*.xml file that describes objects and environments  
565 in terms of their visualization and control. The SDF file contains all of the information related to  
566 the joints (rotational axes, limits, and hierarchical relations) and segments (location, orientation, and  
567 corresponding paths of the meshes) of the biomechanical model. We can modify this file to add or  
568 remove segments, joints, or to modify features of existing segments and joints. To implement joint  
569 DoFs, we used hinge-type joints because they offer more freedom to control individual rotations.  
570 Therefore, for joints with more than one DoF, we positioned in a single location as many rotational  
571 joints as DoFs needed to describe its movement. The parenting hierarchy among these extra joints  
572 was defined as roll-pitch-yaw. The mass and collision mesh were related to the segment attached to  
573 the pitch joint—present in every joint of the model. The extra segments were defined with a zero  
574 mass and no collision shape.

575 Our model is based upon the physical properties of a real fly. The full body length and mass  
576 of the model are set to  $2.8\text{ mm}$  and  $1\text{ mg}$ , respectively. To make the center of mass and the rigid-  
577 body dynamics of the model more similar to a real fly, rather than having a homogeneous mass  
578 distribution, we used different masses (densities) for certain body parts as measured in a previous  
579 study [83]. Specifically, these masses were: head ( $0.125\text{ mg}$ ), thorax ( $0.31\text{ mg}$ ), abdomen ( $0.45\text{ mg}$ ),  
580 wings ( $0.005\text{ mg}$ ), and legs ( $0.11\text{ mg}$ ).

581 In PyBullet, contacts are modeled based on penetration depth between any two interacting bodies.  
582 The contact parameters are set to 0.02 units of length (1 unit = 1 m in SI units). It is preferable to  
583 have the bodies of size larger than 0.02 units. Therefore, we performed dynamic scaling to rescale  
584 the model, the physical units, and quantities such as gravity while preserving the dynamics and  
585 improving the numerical stability of the model. Notably, we are not compromising the dynamics of  
586 the simulated behaviors. Specifically, we scaled up the units of mass and length when setting up the  
587 physics of the simulation environment, and then scaled down the calculated values when recording the  
588 results. Therefore, the physics engine was able to compute the physical quantities without numerical  
589 errors, and the model could also more accurately reflect the physics of a real fly.

#### 590 **4.1.7 Comparing leg sizes between NeuroMechFly and real flies**

591 We dissected the right legs from ten wild-type female adult flies, 2-4 days-post-eclosion. Flies were  
592 cold anesthetized using ice. Then the legs were removed using forceps from the sternal cuticle to avoid  
593 damaging the coxae. Dissected legs were straightened onto a glass slide and fixed with UV-curable  
594 glue (Figure S1A). We used a Leica M205 C stereo microscope to take images from the legs placed  
595 next to a 0.5 mm graduated ruler. Joints in the legs were manually annotated and then distances  
596 between them were measured in pixels and converted to mm using the ruler as a reference. Lengths  
597 between joints were compared to rigged bone lengths in NeuroMechFly.

## 598 **4.2 Kinematic replay and analysis**

### 599 **4.2.1 Forward walking data**

600 We recorded spontaneous behaviors from wild-type females 3-4 days-post-eclosion. Flies were mounted  
601 on a custom stage and allowed to acclimate for 15 min on an air-supported spherical treadmill [38].  
602 Experiments were conducted in the evening Zeitgeber time. Flies were recorded five times for 30 s  
603 at 5 min intervals. Data were excluded if forward walking wasn't present for at least five continuous  
604 seconds in 10 s windows. To record data, we used a 7-camera system as in [33]. However, we replaced  
605 the front camera's InfiniStix lens with a Computar MLM3X-MP lens at 0.3x zoom to visualize the  
606 spherical treadmill. After the fifth trial of each experiment, we recorded an extra 10 s trial, having  
607 replaced the lens from a lateral camera with another Computar MLM3X-MP lens. We used these  
608 images to calculate the longitudinal position of the spherical treadmill with respect to the fly for the  
609 preceding five trials.

#### 610 4.2.2 Foreleg/antennal grooming data

611 Data for kinematic replay of foreleg/antennal grooming were obtained from a previous study de-  
612 scribing DeepFly3D, a deep learning-based 3D pose estimation tool [33]. These data consist of  
613 images from seven synchronized cameras obtained at 100 fps ([https://dataverse.harvard.edu/  
614 dataverse/DeepFly3D](https://dataverse.harvard.edu/dataverse/DeepFly3D)). Time axes (Figure 5E, F) correspond to time points from the original,  
615 published videos. Data were specifically obtained from experiment #3, taken of an animal (#6)  
616 expressing aDN-GAL4 driving UAS-CsChrimson.

#### 617 4.2.3 Processing 3D pose data

618 We used DeepFly3D v0.4 [33] to obtain 3D poses from the images acquired for each behavior. 2D poses  
619 were examined using the GUI to manually correct 10 frames during walking and 72 frames during  
620 grooming. DeepFly3D, like many other pose estimation softwares, uses a local reference system based  
621 on the cameras' positions to define the animal's pose. Therefore, we first defined a global reference  
622 system for NeuroMechFly from which we could compare data from experiments on different animals  
623 (see Figure S7).

624 Aligning both reference systems consisted of six steps. First, we defined the mean position of each  
625 Thorax-Coxa (ThC) keypoint as fixed joint locations. Second, we calculated the orientation of the  
626 vectors formed between the hind and middle coxae on each side of the fly with respect to the global  
627 x-axis along the dorsal plane. Third, we treated each leg segment independently and defined its origin  
628 as the position of the proximal joint. Fourth, we rotated all data points on each leg according to  
629 its side (i.e., left or right) and previously obtained orientations. Fifth, we scaled the real fly's leg  
630 lengths for each experiment to fit NeuroMechFly's leg size: A scaling factor was calculated for each leg  
631 segment as the ratio between its mean length throughout the experiment and the template's segment  
632 length and then each data point was scaled using this factor. Finally, we used the NeuroMechFly  
633 exoskeleton as a template to position all coxae within our global reference system; the exoskeleton  
634 has global location information for each joint. Next, we translated each data point for each leg (i.e.  
635 CTr, FTi, and TiTa joints) with respect to the ThC position based on this template.

#### 636 4.2.4 Calculating joint angles from 3D poses

637 We considered each leg a kinematic chain and calculated the angle of each DoF to reproduce real poses  
638 in NeuroMechFly. We refer to this process as 'kinematic replay'. Angles were obtained by computing  
639 the dot product between two vectors with a common origin. We obtained 42 angles in total, seven per  
640 leg. The angles' names correspond to the rotational axis of the movement—roll, pitch, or yaw—for  
641 rotations around the anterior-posterior, mediolateral, and dorsoventral axes, respectively.

642 The thorax-coxa joint (ThC) has three DoFs. The yaw angle is measured between the dorsoventral  
643 axis and the coxa's projection in the transverse plane. The pitch angle is measured between the  
644 dorsoventral axis and the coxa's projection in the sagittal plane. To calculate the roll angle, we  
645 aligned the coxa to the dorsoventral axis by rotating the kinematic chain from the thorax to the FTi  
646 joint using the yaw and pitch angles. Then we measured the angle between the anterior-posterior  
647 axis and the projection of the rotated FTi in the dorsal plane.

648 Initially, we considered only a pitch DoF for the CTr joint. This was measured between the coxa  
649 and femur's longitudinal axis. Subsequently, we discovered that a CTr roll DoF would be required  
650 to accurately match the kinematic chain. To calculate this angle, we rotated the tibia-tarsus joint  
651 (TiTa) using the inverse angles from the coxa and femur and measured the angle between the anterior-  
652 posterior axis and the projection of the rotated TiTa in the dorsal plane.

653 The pitch angle for the FTi was measured between the femur and tibia's longitudinal axis. The  
654 pitch angle for the TiTa was measured between the tibia and tarsus's longitudinal axis. The direction  
655 of rotation was calculated by the determinant between the vectors forming the angle and its rotational  
656 axis. If the determinant was negative, the angle was inverted.

657 To demonstrate that the base six DoFs were not sufficient for accurate kinematic replay, we also  
658 compared these results to angles obtained using inverse kinematics. In other words, we assessed  
659 whether an optimizer could find a set of angles that could precisely match our kinematic chain using  
660 only these six DoFs. To compute inverse kinematics for each leg, we used the optimization method  
661 implemented in the Python IKPy package (L-BFGS-B from Scipy). We defined the zero-pose as a  
662 kinematic chain and used the angles from the first frame as an initial position (seed) for the optimizer.



#### 663 4.2.5 Calculating forward kinematics and errors with respect to 3D poses

664 To quantify the contribution of each DoF to kinematic replay, we used the forward kinematics method  
665 to compare original and reconstructed poses. Since 3D pose estimation noise causes leg segment  
666 lengths to vary, we first fixed the length of each segment as its mean length across all video frames.

667 We then calculated joint angles from 3D pose estimates with the addition of each DoF (see previous  
668 section). We formed a new kinematic chain including the new DoF. This kinematic chain allowed us  
669 to compute forward kinematics from joint angles, which were then compared with 3D pose estimates  
670 to calculate an error. We performed an exhaustive search to find angles that minimize the overall  
671 distance between each 3D pose joint position and that joint's position as reconstructed using forward  
672 kinematics. The search spanned from  $-90^\circ$  to  $90^\circ$  with respect to the 'zero pose' in  $0.5^\circ$  increments.

673 The error between 3D pose-based and angle-based joint positions per leg was calculated as the  
674 average distance across every joint. We note that differences in errors can vary across legs and leg pairs  
675 because each joint's 3D pose estimate is independent and each leg acts as an independent kinematic  
676 chain adopting its own pose. Thus, errors may also be asymmetric across the body halves. As well,  
677 errors integrate along the leg when using forward kinematics (FK) for walking (Figure S2) and for  
678 grooming (Figure S3). By contrast, inverse kinematics (IK) acts as an optimizer and minimizes the  
679 error at the end of the kinematic chain (i.e., where the FK error is highest) for walking (Figure S2D)  
680 and for grooming (Figure S3D). This explains why errors using FK are generally higher than those  
681 using IK—with the exception of adding a roll degree-of-freedom at the Coxa-Trochanter joint. To  
682 normalize the error with respect to body length, we measured the distance between the antennae and  
683 genitals in our Blender model (2.88 mm). Errors were computed using 400 frames of data: frames  
684 300-699 for forward walking from fly 1 and frames 0-399 for foreleg/antennal grooming.

685 We ran a Kruskal-Wallis statistical test to compare kinematic errors across the eight methods  
686 used. We then applied a posthoc Conover's test to perform a pairwise comparison. We used the  
687 Holm method to control for multiple comparisons. The resulting p-value matrices for walking and  
688 foreleg/antennal grooming behaviors are shown in Table 2 and Table 3, respectively. Our statistical  
689 tests suggested that adding a CTr roll DoF uniquely improved kinematic replay compared with all  
690 other methods.

#### 691 4.2.6 Transferring real 3D poses into the NeuroMechFly reference frame

692 To incorporate the additional CTr roll DoF into NeuroMechFly, we enabled rotations along the  $z$  axis  
693 of CTr joints. Then, we created new SDF configuration files using custom Python scripts to include  
694 a CTr roll DoF for each leg. To simulate the fly tethering stage used in our experiments, we added  
695 three support joints (one per axis of movement) that would hold our model in place. We removed  
696 these supports for ground walking experiments (Videos 8 and 10).

697 We used position control for each joint in the model. We fixed the position of non-actuated joints  
698 to the values shown in Table 4. The actuated joints (i.e. the leg joints) were controlled to achieve the  
699 angles calculated from 3D pose data. The simulation was run with a time step of  $0.5\text{ ms}$ , allowing  
700 PyBullet to accurately perform numerical calculations. Since the fly recordings were only captured  
701 at 100 fps, we up-sampled and interpolated pose estimates to match the simulation time steps before  
702 calculating joint angles.

#### 703 4.2.7 Comparing real and simulated spherical treadmill rotations

704 We obtained spherical treadmill rotational velocities from real experiments using Fictrac [57]. We  
705 also obtained the relative inclination of each tethered fly ( $\Phi$ ) (Figure S9A) as the angle between  
706 the ground plane and the axis between the hind leg ThC joint and the dorsal part of the neck.  
707 Finally, we estimated the position of the ball with respect to the fly from both front and lateral views  
708 (Figure S9B-C) by identifying the ball and fly using a Hough transform and standard thresholding,  
709 respectively. For axes observed from both views, we averaged the expected position.

710 For the simulated environment we created a spherical body in PyBullet with three hinge joints  
711 along the  $x$ ,  $y$ , and  $z$  axes, allowing our sphere to rotate in each direction like a real spherical treadmill.  
712 Rolling and spinning frictions were set to zero to obtain virtually frictionless conditions similar to a  
713 real treadmill floating on air. The mass of the simulated spherical treadmill was set to  $54.6\text{ mg}$ : the  
714 measured mass of the real foam sphere. Finally, the sphere's diameter was measured and set into the  
715 simulation as  $9.96\text{ mm}$ .

716 We ran kinematic replay of walking by setting the simulated spherical treadmill position and  
717 fly inclination based on measurements from experimental images. We used predefined values for  
718 kinematic replay of grooming. Then, we empirically determined the following parameters:

- 719 • Global ERP = 0.0
- 720 • Friction ERP = 0.0
- 721 • Solver iterations = 1000
- 722 • Treadmill lateral friction = 1.3

723 After running the simulation, we compared the rotational velocities estimated for each axis with  
724 the real velocities obtained with Fictrac. First, we smoothed both Fictrac and estimated signals using  
725 a median filter with a window size of 0.1 s. Second, we interpolated Fictrac data from time steps of  
726 0.1 s (100 fps) to the simulation time step. Then, we established each signal’s baseline as the mean  
727 of the first 0.2 s of data. Finally, we computed the Spearman correlation coefficient ( $\rho$ ) to assess  
728 correlations of forward, lateral, and heading (yaw) velocities for both signals.

#### 729 4.2.8 Constraint parameter sensitivity analysis

730 Simulated spherical treadmill velocity estimates depend on constraint force mixing (CFM) and contact  
731 error reduction (contact ERP) parameters. These parameters change the ‘softness’ of joint and contact  
732 constraints in the physics engine. Therefore we performed a sensitivity analysis to determine the best  
733 combination of CFM and ERP. CFM values were swept from 0 to 10, and ERP from 0 to 1.0. Then,  
734 we ran a simulation for each of 121 combinations. We assessed their performance by calculating the  
735 Spearman correlation coefficient for each axis (Figure S8A-C).

736 Finally, to select optimal parameter values, we applied a weighted sum to the results as shown in  
737 Equation 1:

$$WS_i = \alpha * Fw(\rho_i) + \beta * Lat(\rho_i) + \gamma * Head(\rho_i) \quad (1)$$

738 where Fw, Lat, and Head are the rotational axes,  $\rho_i$  is the Spearman correlation coefficient  
739 obtained for each CFM-ERP combination, and  $\alpha$ ,  $\beta$ , and  $\gamma$  are the standard deviation contributions  
740 for each axis calculated as shown in Equations 2, 3, and 4, respectively. Therefore, we favored the  
741 axis with the largest amplitude of variation.

$$\alpha = \frac{std(Fw)}{std(Fw) + std(Lat) + std(Head)} \quad (2)$$

$$\beta = \frac{std(Lat)}{std(Fw) + std(Lat) + std(Head)} \quad (3)$$

$$\gamma = \frac{std(Head)}{std(Fw) + std(Lat) + std(Head)} \quad (4)$$

742 Finally, we normalized WS (NWS) with respect to its maximum and minimum values (Fig-  
743 ure S8D). Consequently, a combination with NWS equal to 1 was selected: CFM = 3 and ERP  
744 = 0.1.

#### 745 4.2.9 Controller gain sensitivity analysis

We performed kinematic replay using a built-in PD position controller in PyBullet [42]. A PD controller was used rather than the more widely known PID controller because the integral component (‘I’ in PID) is mainly used to correct steady state errors (e.g., while maintaining a fixed posture). Thus, it is not used for time-varying postures like those during locomotion. We used PyBullet’s built-in position control method because it operates with proportional and derivative gains that are stable and efficient. This PD controller minimizes the error:

$$error = K_p(\theta_r - \theta_a) + K_d(\omega_r - \omega_a) \quad (5)$$

746 where  $\theta_r$  and  $\theta_a$  denote reference and actual positions,  $\omega_r$  and  $\omega_a$  are desired and actual velocities,  
747 and  $K_p$  and  $K_d$  are proportional and derivative gains, respectively, which provides some compliance  
748 in the model.

749 Because the outputs of our model—dynamics of motion—depend on the controller gains  $K_p$  and  
750  $K_d$ , we first systematically searched for optimal gain values. To do this, we ran the simulation’s  
751 kinematic replay for numerous  $K_p$  and  $K_d$  pairs, ranging from 0.1 to 1.0 with a step size of 0.1  
752 (i.e., 100 simulations in total). Target position and velocity signals for the controller were set as the  
753 calculated joint angles and angular velocities, respectively. To compute joint angular velocities, we  
754 used a Savitzky–Golay filter with a first-order derivative and a time-step of 0.5 ms on the joint angles.  
755 Feeding the controller with only the joint angles could also achieve the desired movements of the  
756 model. However, including the velocity signal ensured that the joint angular velocities of the fly and  
757 the simulation were properly matched. We then calculated the mean squared error (MSE) between  
758 the ground truth—joint angles obtained by running our kinematic replay pipeline on pose estimates  
759 from DeepFly3D [33]—and joint angles obtained from PyBullet. Then, we averaged the MSE values  
760 across the joints in one leg, and summed the mean MSEs from each of six legs to obtain a total error.  
761 We made the same calculations for the joint angular velocities as well. Our results (Figure S4) show  
762 that our biomechanical model can replicate real 3D poses while also closely matching real measured  
763 velocities. In particular, an MSE of  $360 \text{ (rad/sec)}^2$  for the six legs corresponds approximately to  $7.74$   
764  $\text{rad/sec}$  per leg, i.e.,  $1.27 \text{ Hz}$ . This is acceptable given the rapid, nearly 20 Hz, leg movements of the  
765 real fly.

766 After validating the accuracy of kinematic replay, we performed a sensitivity analysis to measure  
767 the impact of varying controller gains on the estimated torques and ground reaction forces. This  
768 analysis showed that torques and ground reaction forces are highly sensitive to changing proportional  
769 gains ( $K_p$ ) (Figure S5) but are robust to variations in derivative gain ( $K_d$ ). These results are ex-  
770 pected since high proportional gains cause “stiffness” in the system whereas derivative gains affect  
771 the “damping” in a system’s response. We observed rapid changes in estimated torques and ground  
772 reaction forces at high  $K_p$  values (Figure S5). Notably, in principle there can also be internal forces  
773 affecting contact forces. For example, a fly’s legs can squeeze the spherical treadmill with different  
774 internal forces but have identical postures.

775 As shown in Figure S4, our model can match the real kinematics closely for almost every controller  
776 gain combination except for the low  $K_p, K_d$  band. By contrast, varying the gains proportionally  
777 increased the torque and force readings. Because there are no experimental data to validate these  
778 physical quantities, we selected gain values corresponding to intermediate joint torques and ground  
779 contact forces (Figure S5). Specifically, we chose 0.4 and 0.9 for  $K_p$  and  $K_d$ , respectively. These values  
780 were high enough to generate smooth movements, and low enough to reduce movement stiffness.

#### 781 4.2.10 Comparing tethered and flat ground walking

782 To test the ability to run NeuroMechFly in an untethered context, we replayed the kinematics of  
783 a tethered walking experiment (Figure 4) but removed body supports and placed the model on the  
784 floor. To remove body supports, we deleted the corresponding links from the model’s description  
785 (SDF configuration file). The physics engine parameters remained the same. The lateral friction for  
786 the floor was set to 0.1.

#### 787 4.2.11 Application of external perturbations

To test the stability of the untethered model walking over flat ground, we set the floor’s lateral friction  
to 0.5 and introduced external perturbations. Specifically, we propelled solid spheres at the model  
according to the following equation of motion,

$$\vec{p} = \vec{r}_0 + \vec{u}_0 t + \frac{1}{2} \vec{g} t^2 \quad (6)$$

788 where,  $\vec{p}$  is the 3D target position (fly’s center of mass),  $\vec{r}_0$  is the initial 3D position of the sphere,  $\vec{u}_0$   
789 is the initial velocity vector,  $\vec{g}$  is the external acceleration vector due to gravity in the z-direction,  $t$   
790 is the time taken by the sphere to reach the target position  $\vec{p}$  from  $\vec{r}$  with an initial velocity  $\vec{u}$ . The  
791 mass of the sphere was  $3 \text{ mg}$  and its radius  $50 \text{ }\mu\text{m}$ . Spheres were placed at a distance of  $2 \text{ mm}$  from  
792 the fly’s center of mass in the y-direction. With  $t$  set to  $20 \text{ ms}$ , the initial velocity of the projectile  
793 was computed using Equation 6. The spheres were propelled at the model every 0.5 s. Finally, at 3

794 *s* into the simulation, a 3 *g* sphere with a radius of 150  $\mu\text{m}$  was propelled at the fly to topple it over  
795 (**Video 10**).

#### 796 4.2.12 Analyzing NeuroMechFly’s contact and collision data

797 The PyBullet physics engine generates forward dynamics simulations and collision detections. We  
798 plotted joint torques as calculated from PyBullet. To infer ground reaction forces (GRFs), we com-  
799 puted and summed the magnitude of normal forces resulting from contact of each tarsal segment with  
800 the ball. Gait diagrams were generated by thresholding GRFs; a leg was considered to be in stance  
801 phase if its GRFs was greater than zero. These gait diagrams were compared with a ground truth  
802 (**Figure S10**) obtained by manually annotating when the legs were in contact with the ball for each  
803 video frame. Gait prediction accuracy was calculated by dividing the frames correctly predicted as  
804 being in stance or swing over the total number of frames.

805 Self-collisions are disabled by default in PyBullet. Therefore, for kinematic replay of grooming, we  
806 enabled self-collisions between the tibia and tarsal leg segments, as well as the antennae. We recorded  
807 normal forces generated by collisions between (i) the right and left front leg, (ii) the left front leg  
808 and left antenna, and (iii) the right front leg and right antenna. Grooming diagrams were calculated  
809 as for gait diagrams: a segment experienced a contact/collision if it reported a normal force greater  
810 than zero.

#### 811 4.2.13 Comparing grooming behaviors as a function of NeuroMechFly’s morphological 812 accuracy

813 We replayed foreleg/antennal grooming kinematics (**Figure 5**) for three conditions to assess the degree  
814 to which biomechanical realism is important for collision estimation. We tested two experimental  
815 conditions: one in which both front legs were modelled as sticks, and one in which the front legs as  
816 well as the antennae were modelled as sticks. Notably, multisegmented tarsi are not found in other  
817 published insect stick models [64]. Thus, as for our previous model [24], each stick leg consisted  
818 of four segments: coxa, trochanter/femur, tibia, and one tarsal segment. Each leg and antennal  
819 stick segment had a diameter equal to the average diameter of the corresponding segment in our  
820 more detailed NeuroMechFly model. These changes were accomplished by modifying the model’s  
821 description (SDF configuration file) and by changing the collision and visual attributes for each  
822 segment of interest.

### 823 4.3 Neural network parameter optimization

#### 824 4.3.1 CPG network architecture

825 For evolutionary optimization of neuromuscular parameters, we designed a CPG-based controller  
826 composed of 36 nonlinear oscillators (**Figure 6**), as for a previous investigation of salamander locomotion  
827 [62]. These CPGs consisted of mathematical oscillators that represent neuronal ensembles firing  
828 rhythmically in the Ventral Nerve Cord (VNC) [84]. The CPG model was governed by the following  
829 system of differential equations:

$$\dot{\theta}_i = 2\pi\nu_i + \sum_j r_j w_{ij} \sin(\theta_j - \theta_i - \phi_{ij}) \quad (7)$$

$$\dot{r}_i = a_i(R_i - r_i) \quad (8)$$

$$M_i = r_i(1 + \sin(\theta_i)) \quad (9)$$

830 where the state variables—phase and amplitude of the oscillator *i*—are denoted  $\theta_i$  and  $r_i$ , respectively;  
831  $\nu_i$  and  $R_i$  represent oscillator *i*’s intrinsic frequency and amplitude,  $a_i$  is a constant. The coupling  
832 strength and phase bias between the oscillator *i* and *j* are denoted  $w_{ij}$  and  $\phi_{ij}$ , respectively.

833 During optimization, for the entire network of coupled oscillators, we set the intrinsic frequency  $\nu$   
834 as an open parameter ranging from 6 to 10 Hz, matching the frequencies of our measured *Drosophila*  
835 joint angle movements and reported stepping frequencies [65]. The intrinsic amplitude  $R$  was set  
836 to 1, and the constant  $a_i$  was set to 25. To ensure a faster convergence to a phase-locked regime

837 between oscillators, we set coupling strengths to 1000 [85].  $M_i$  represents the cyclical activity pattern  
838 of neural ensembles activating muscles. We solved this system of differential equations using the  
839 explicit Runge-Kutta method of 5th-order with a time step of 0.1 ms.

840 Each oscillator pair sends cyclical bursts to flexor and extensor muscles which apply antagonistic  
841 torques to the corresponding revolute joint. We considered three DoFs per leg that were sufficient  
842 for locomotion in previous hexapod models [64] and that had the most pronounced joint angles  
843 (Figure S13). These DoFs were (i) ThC pitch for the front legs, (ii) ThC roll for the middle and hind  
844 legs, and (iii) CTr pitch and FTi pitch for all legs. Thus, there were three pairs of oscillators optimized  
845 per leg, for a total of 36. We coupled (i) the intraleg oscillators in a proximal to distal chain, (ii)  
846 the interleg oscillators in a tripod-like fashion (the ipsilateral front and hind legs to the contralateral  
847 middle leg from anterior to posterior), (iii) both front legs to each other, and (iv) coxa extensor and  
848 flexor oscillators to one another. Intraleg coordination is equally important to generate a fly-like gaits  
849 since stance and swing phases depend on intrasegmental phase relationships. For this reason, both  
850 interleg (phase relationships between ThC joints) and intraleg (phase relationships within each leg)  
851 couplings were optimized for one half of the body and mirrored on the other.

### 852 4.3.2 Muscle model

We adapted an ‘Ekeberg-type’ muscle model [63] to generate torques on the joints. This model  
simulates muscles as a torsional spring and damper system, allowing torque control of any joint as a  
linear function of motor neuron (CPG output) activities driving antagonist flexor ( $M_F$ ) and extensor  
( $M_E$ ) muscles controlling that joint. The torque exerted on a joint is given by the equation:

$$T = \alpha(M_F - M_E) + \beta(M_F + M_E + \gamma)\Delta\varphi + \delta\dot{\varphi} \quad (10)$$

853 where  $\alpha, \beta, \gamma$ , and  $\delta$  represent the gain, stiffness gain, tonic stiffness, and damping coefficient, respec-  
854 tively [9].  $\Delta\varphi$  is the difference between the current angle of the joint and its resting pose.  $\dot{\varphi}$  is the  
855 angular velocity of the joint. This muscle model makes it possible to control the static torque and  
856 stiffness of the joints based on optimized muscle coefficients— $\alpha, \beta, \gamma, \delta$ , and  $\Delta\varphi$ .

### 857 4.3.3 CPG network and muscle parameter optimization

858 To identify neuromuscular network parameters that could coordinate fast and statically stable lo-  
859 comotion, we optimized the phase differences for each network connection, the intrinsic frequency  
860 of the oscillators, and five parameters controlling the gains and resting positions of each spring and  
861 damper muscle (i.e.,  $\alpha, \beta, \gamma, \delta$ , and  $\Delta\varphi$ ). To simplify the problem for the optimizer, we (i) fixed ThC  
862 flexor-extensor phase differences to  $180^\circ$ , making them perfectly antagonistic, (ii) mirrored the phase  
863 differences from the right leg oscillators to the left leg oscillators, (iii) mirrored muscle parameters  
864 from the right joints to the left joints, and (iv) mirrored phase differences from ThC-ThC flexors  
865 to ThC-ThC extensors. Thus, a total of 63 open parameters were set by optimization: five phases  
866 between ThC CPGs (Figure 6, A), 12 phases between intraleg CPGs (ThC-FTi extensor/flexor,  
867 FTi-TiTa extensor/flexor per leg), 45 muscle parameters (five per joint), and one parameter ( $\nu$ )  
868 controlling the intrinsic frequency of the oscillators. We empirically set the lower and upper bounds  
869 for the parameters so leg movements would stay stable along the boundaries (Table 6). Upper and  
870 lower bounds for the resting positions of the joints used in the muscle model were set as the first and  
871 third quartiles of measured locomotor angles. Finally, we optimized the intrinsic frequency of CPGs,  
872 denoted by  $\nu$  in Eq. 7 to be between 6 and 10 Hz for the reasons described above.

873 For parameter optimization, we used NSGA-II [67], a multi-objective genetic algorithm imple-  
874 mented in Python using the jMetalPy library [86]. We defined two objective functions. First, we  
875 aimed to maximize locomotor speed, as quantified by the number of spherical treadmill rotations  
876 (Equation 11) along the  $Y$  axis within a specific period of time. Second, we maximized static sta-  
877 bility. In small animals like *Drosophila*, static stability is a better approximation for overall stability  
878 than dynamic stability [83]. We measured static stability by first identifying a convex hull formed  
879 by the legs in stance phase. If there were less than three legs in stance and a convex hull could not  
880 be formed, the algorithm returned -1, indicating static instability. Then, we measured the closest  
881 distance between the fly’s center of mass—dynamically calculated based on the fly’s moving body  
882 parts—and the edges of the convex hull. Finally, we obtained the minimum of all measured distances

883 at that time step. If the center of mass was outside the convex hull, we reversed the sign of the mini-  
 884 mum distance to indicate instability. Because the optimizer works by minimizing objective functions,  
 885 we inverted the sign of speed and stability values: the most negative values meant the fastest and  
 886 most stable solutions, respectively.

887 Four penalties were added to the objective functions. First, to make sure the model was always  
 888 moving, we set a moving lower and upper threshold for the angular rotation of the ball, increasing from  
 889  $-0.2 \text{ rad}$  to  $1.0 \text{ rad}$  and from  $0$  to  $7.2 \text{ rad}$  in one second, respectively. These values were determined  
 890 such that the lower moving boundary was slower than the slowest reported walking speed of *Drosophila*  
 891 ( $10 \text{ mm/s} = 2 \text{ rad}$  when the ball radius  $r$  is  $5 \text{ mm}$ ) [65] and the upper moving boundary would exceed  
 892 the highest reported walking speed ( $34 \text{ mm/s} = 6.8 \text{ rad}$ ) [28]. Second, to avoid high torque and  
 893 velocities at each joint, we set joint angular velocities to have an upper limit of  $250 \text{ rad/s}$ , a value  
 894 measured from real fly experiments. Third, because we do not introduce physical joint limits in  
 895 the model, we emulated these joint limits by setting a penalty on the difference between the joint  
 896 angle range observed during kinematic replay of walking and the joint angles of individual solutions.  
 897 We used this penalty to prevent joint angles from generating unrealistic movements (e.g., one full  
 898 rotation around a DoF). Fourth, because the optimizer can exploit the objective function by simply  
 899 leaving all legs on the ground—the highest possible stability—or can rotate the ball by using as few  
 900 as two legs while the remaining legs are constantly on the ground, we introduced a penalty on duty  
 901 factors. Specifically, we computed the ratio of stance phase duration to the entire epoch and penalized  
 902 solutions whose duty factors for each leg were outside of the range  $[0.4, 0.9]$ , based on [28].

903 The optimization was formulated as follows

$$\min -10 \cdot R_b \cdot \theta_{b,\parallel} + 0.1 \cdot p_v + 0.05 \cdot p_{jl} + 0.1 \cdot p_m + 100 \cdot p_d \quad (\text{Distance \& penalties}) \quad (11)$$

$$\min -0.01 \cdot s + 0.1 \cdot p_v + 0.05 \cdot p_{jl} + 0.1 \cdot p_m + 100 \cdot p_d \quad (\text{Stability \& penalties}), \quad (12)$$

904 with the following penalty terms

$$p_m^i = \begin{cases} p_t^{i-1} + 1 & \text{if } \theta_{b,\parallel} \leq \left(\frac{t}{t_{total}} \cdot 1.20 - 0.20\right) \text{ or } \theta_{b,\parallel} \geq \left(\frac{t}{t_{total}} \cdot 7.20\right) \\ p_t^{i-1} & \text{otherwise} \end{cases} \quad (\text{Moving boundary penalty}) \quad (13)$$

$$p_v^i = \begin{cases} p_v^{i-1} + 1 & \text{if } \omega > 250 \text{ rad/sec} \\ p_v^{i-1} & \text{otherwise} \end{cases} \quad (\text{Angular velocity penalty}) \quad (14)$$

$$p_{jl}^i = \begin{cases} p_{jl}^{i-1} + \sum_k \theta_k - \max(\text{joint limit}_k) & \text{if } \theta_k \geq \max(\text{joint limit}_k) \\ p_{jl}^{i-1} + \sum_k -\theta_k + \min(\text{joint limit}_k) & \text{if } \theta_k \leq \min(\text{joint limit}_k) \\ p_{jl}^{i-1} & \text{otherwise} \end{cases} \quad (\text{Joint limit penalty}) \quad (15)$$

$$p_d^i = \begin{cases} p_d^{i-1} + 1 & \text{if } \frac{t_{stance}^k}{t_{bout}^k} < 0.4 \text{ or } \frac{t_{stance}^l}{t_{bout}^l} > 0.9 \text{ for } l = 1, 2, \dots, 6 \\ p_d^{i-1} & \text{otherwise} \end{cases} \quad (\text{Duty factor penalty}), \quad (16)$$

905 where  $R_b$  is the ball radius ( $5 \text{ mm}$ ),  $\theta_{b,\parallel}$  is the angle of the ball in the direction of walking,  $t_{tot}$  is  
 906 the maximum simulation duration,  $\theta_k$  is the angular position of the joint  $k$ ,  $t_{stance}^l$  and  $t_{bout}^l$  are the  
 907 total times spent in stance and the entire walking epoch duration of the leg  $l$ . Every penalty was  
 908 multiplied by its corresponding weight and added to the objective function. Objective functions were  
 909 evaluated for  $2 \text{ s}$  ( $t_{total}$ ), a period that was sufficiently long for the model to generate locomotion.  
 910 We ran 60 generations with the weights given in Equation 11 and Equation 12.

911 To avoid a high computational cost during optimization, we reduced the model's complexity  
 912 by removing collision shapes, like the wings and head, that were not required for locomotion, and  
 913 converting joints that are not used in the simulation (see Table 4) from revolute to fixed. This model  
 914 was saved as a new SDF file. Thus, we could reduce computational time and memory needed to check  
 915 for collisions on unused body segments, and for the position controller to set unused joints to fixed  
 916 positions. This simplification increased the speed of the simulation, allowing us to reduce the time

917 step to 0.1 ms and to run optimization with larger populations. In the simulation, we used a spherical  
918 treadmill with a mass, radius, and friction coefficient of 54.6 *mg*, 5 *mm*, and 1.3, respectively. We  
919 additionally increased the friction coefficient of the leg segments from the default value of 0.5 to 1.0.

920 Each optimization generation had a population of 200 individuals. Optimization runs lasted for 60  
921 generations, a computing time of approximately 20 hours per run on an Intel(R) Core(TM) i9-9900K  
922 CPU at 3.60GHz. Mutations occurred with a probability of 1.0 divided by number of parameters  
923 (63), and a distribution index of 20. We set the cross-over probability to 0.9 and the distribution  
924 index to 15 (for more details see [86]).

#### 925 4.3.4 Analysis of optimization results

926 After optimization, we selected three individual solutions from the last generation for deeper analysis.  
927 First, the objective functions were normalized with respect to their maximum and minimum values.  
928 Note that the signs of the objective functions were inverted. Then, solutions were selected as follows:

$$\begin{aligned} \text{Longest distance traveled (fastest):} & \quad i = \operatorname{argmin}(d_g) \\ \text{Highest stability coefficient (most stable):} & \quad i = \operatorname{argmin}(s_g) \\ \text{Distance-Stability minimum 2-norm (trade-off):} & \quad i = \operatorname{argmin}\left(\sqrt{d_g^2 + s_g^2}\right), \end{aligned}$$

929 where  $d_g$  and  $s_g$  are the vectors containing the distance and stability values, respectively, from all  
930 individuals in a given generation  $g$ .

We plotted CPG activity patterns (as represented by the couple oscillators' outputs), joint torques, joint angles, GRFs, and ball rotations from this final generation of solutions. GRFs were used to generate gait diagrams as previously described. Ball rotations were used to reconstruct the models' walking paths. The distances travelled along the longitudinal ( $x$ ) and transverse ( $y$ ) axes were calculated from the angular displacement of the ball according to the following formula:

$$\Delta x = \Delta\theta_t r \qquad \Delta y = \Delta\theta_l r,$$

931 where  $\Delta\theta_t$  and  $\Delta\theta_l$  denote the angular displacement around the transverse and longitudinal axes,  
932 respectively, and  $r$  is the radius of the ball.

## 933 5 Supplementary Tables

Table 1: Model body parts and degrees-of-freedom between each segment and its parent.

| Body part | Segment               | Parent  | Degrees of freedom |
|-----------|-----------------------|---------|--------------------|
| Abdomen   | A1A2                  | Thorax  | 1                  |
|           | A3                    | A1A2    | 1                  |
|           | A4                    | A3      | 1                  |
|           | A5                    | A4      | 1                  |
|           | A6                    | A5      | 1                  |
| Head      | Head capsule          | Thorax  | 3                  |
|           | Eyes (x2)             | Head    | 0                  |
|           | Antennae (x2)         |         | 1                  |
|           | Rostrum               |         | 1                  |
|           | Haustellum            | Rostrum | 1                  |
| Legs      | Coxa (x6)             | Thorax  | 3                  |
|           | Trochanter/Femur (x6) | Coxa    | 2                  |
|           | Tibia (x6)            | Femur   | 1                  |
|           | Tarsus1 (x6)          | Tibia   | 1                  |
|           | Tarsus2 (x6)          | Tarsus1 | 1                  |
|           | Tarsus3 (x6)          | Tarsus2 | 1                  |
|           | Tarsus4 (x6)          | Tarsus3 | 1                  |
|           | Tarsus5-Claw (x6)     | Tarsus4 | 1                  |
| Thorax    | Halteres (x2)         | Thorax  | 3                  |
|           | Wings (x2)            |         | 3                  |
|           | Thorax                | -       | 0                  |

Table 2: Matrix of p-values from pairwise comparisons of position errors after calculating forward kinematics for walking. Numbers in bold (except in the case of identity) indicate that the p-value > 0.001 (i.e., no statistical difference).

|                  | Base            | IK        | Base & CTr roll | Base & CTr yaw  | Base & FTi roll | Base & FTi yaw | Base & TiTa roll | Base & TiTa yaw |
|------------------|-----------------|-----------|-----------------|-----------------|-----------------|----------------|------------------|-----------------|
| Base             | 1.00            | 5.42e-13  | 0.00            | 7.08e-184       | 2.28e-133       | 4.53e-50       | <b>9.95e-01</b>  | 1.53e-197       |
| IK               | 5.42e-13        | 1.00      | 0.00            | 4.48e-285       | 4.37e-222       | 6.82e-110      | 5.42e-13         | 8.62e-302       |
| Base & CTr roll  | 0.00            | 0.00      | 1.00            | 5.49e-138       | 2.96e-189       | 0.00           | 0.00             | 1.57e-126       |
| Base & CTr yaw   | 7.08e-184       | 4.48e-285 | 5.49e-138       | 1.00            | 2.52e-05        | 5.13e-45       | 7.83e-184        | <b>5.38e-01</b> |
| Base & FTi roll  | 2.28e-133       | 4.37e-222 | 2.96e-189       | 2.52e-05        | 1.00            | 8.33e-22       | 2.44e-133        | 1.08e-07        |
| Base & FTi yaw   | 4.53e-50        | 6.82e-110 | 0.00            | 5.13e-45        | 8.33e-22        | 1.00           | 4.53e-50         | 6.05e-52        |
| Base & TiTa roll | <b>9.95e-01</b> | 5.42e-13  | 0.0             | 7.83e-184       | 2.44e-133       | 4.53e-50       | 1.00             | 1.71e-197       |
| Base & TiTa yaw  | 1.53e-197       | 8.63e-302 | 1.57e-126       | <b>5.38e-01</b> | 1.08e-07        | 6.05e-52       | 1.71e-197        | 1.00            |



Table 3: Matrix of p-values matrix from pairwise comparisons of position errors after calculating forward kinematics for grooming. Numbers in bold (except in the case of identity) indicate that the p-value  $> 0.001$  (i.e., no statistical difference).

|                  | Base        | IK              | Base & CTr roll | Base & CTr yaw  | Base & FTi roll | Base & FTi yaw | Base & TiTa roll | Base & TiTa yaw |
|------------------|-------------|-----------------|-----------------|-----------------|-----------------|----------------|------------------|-----------------|
| Base             | 1.00        | 4.34e-128       | 0.00            | 7.57e-149       | 2.59e-131       | 4.72e-32       | <b>1.00</b>      | 2.47e-192       |
| IK               | 4.34e-128   | 1.00            | 0.00            | <b>2.02e-01</b> | <b>1.00</b>     | 4.30e-34       | 3.27e-126        | 1.11e-07        |
| Base & CTr roll  | 0.00        | 0.00            | 1.00            | 0.00            | 0.00            | 0.00           | 0.00             | 0.00            |
| Base & CTr yaw   | 7.57e-149   | <b>2.02e-01</b> | 0.00            | 1.00            | <b>3.04e-01</b> | 2.56e-45       | 8.05e-147        | <b>1.08e-03</b> |
| Base & FTi roll  | 2.59e-131   | <b>1.00</b>     | 0.00            | <b>3.04e-01</b> | 1.00            | 8.96e-36       | 2.08e-129        | 5.70e-07        |
| Base & FTi yaw   | 4.72e-32    | 4.30e-34        | 0.00            | 2.56e-45        | 8.96e-36        | 1.00           | 3.84e-31         | 4.86e-71        |
| Base & TiTa roll | <b>1.00</b> | 3.27e-126       | 0.00            | 8.05e-147       | 2.08e-129       | 3.84e-31       | 1.00             | 4.85e-190       |
| Base & TiTa yaw  | 2.47e-192   | 1.11e-07        | 0.00            | <b>1.08e-03</b> | 5.70e-07        | 4.86e-71       | 4.85e-190        | 1.00            |

Table 4: Fixed angles for body joints during kinematic replay and optimization.

| Body part | Joint              | Fixed angle (deg) | Body part | Joint               | Fixed angle (deg) |
|-----------|--------------------|-------------------|-----------|---------------------|-------------------|
| Abdomen   | A1A2               | 0                 | Thorax    | Left haltere roll   | 0                 |
|           | A3                 | -15               |           | Left haltere pitch  | 0                 |
|           | A4                 | -15               |           | Left haltere yaw    | 0                 |
|           | A5                 | -15               |           | Right haltere roll  | 0                 |
|           | A6                 | -15               |           | Right haltere pitch | 0                 |
| Head      | Head capsule roll  | 0                 |           | Right haltere yaw   | 0                 |
|           | Head capsule pitch | 10                |           | Left wing roll      | 90                |
|           | Head capsule yaw   | 0                 |           | Left wing pitch     | 0                 |
|           | Left antenna       | 35                |           | Left wing yaw       | -17               |
|           | Right antenna      | -35               |           | Right wing roll     | -90               |
|           | Rostrum            | 90                |           | Right wing pitch    | 0                 |
|           | Haustellum         | -60               |           | Right wing yaw      | 17                |

Table 5: Fixed angles for leg joints during optimization (deg).

| Body Part | Side  | ThC yaw | ThC pitch | ThC roll | CTr pitch | CTr roll | FTi      | TiTa |
|-----------|-------|---------|-----------|----------|-----------|----------|----------|------|
| Front     | Left  | 0       | actuated  | 10       | actuated  | 0        | actuated | -39  |
|           | Right | 0       | actuated  | -10      | actuated  | 0        | actuated | -39  |
| Middle    | Left  | 7.45    | -5        | actuated | actuated  | 0        | actuated | -54  |
|           | Right | -7.45   | -5        | actuated | actuated  | 0        | actuated | -54  |
| Hind      | Left  | 3.45    | 6.2       | actuated | actuated  | 0        | actuated | -45  |
|           | Right | -3.45   | 6.2       | actuated | actuated  | 0        | actuated | -45  |

Table 6: Lower and upper limits for the muscle parameters during optimization.

| Body part  | Joint     | $\Delta\varphi$<br>[Lower limit, Upper limit] | $\alpha$<br>[Lower limit, Upper limit]  | $\beta$<br>[Lower limit, Upper limit]   | $\gamma$<br>[Lower limit, Upper limit] | $\delta$<br>[Lower limit, Upper limit]   |
|------------|-----------|-----------------------------------------------|-----------------------------------------|-----------------------------------------|----------------------------------------|------------------------------------------|
| Front leg  | ThC pitch | [0.0, 0.47]                                   | $[1 \times 10^{-10}, 5 \times 10^{-9}]$ | $[1 \times 10^{-10}, 1 \times 10^{-9}]$ | [1.0, 10.0]                            | $[5 \times 10^{-13}, 1 \times 10^{-11}]$ |
|            | CTr pitch | [-2.0, -1.68]                                 | $[1 \times 10^{-10}, 1 \times 10^{-9}]$ |                                         |                                        |                                          |
|            | FTi       | [1.31, 2.05]                                  | $[1 \times 10^{-10}, 1 \times 10^{-9}]$ |                                         |                                        |                                          |
| Middle leg | ThC pitch | [2.18, 2.01]                                  | $[1 \times 10^{-10}, 5 \times 10^{-9}]$ |                                         |                                        |                                          |
|            | CTr pitch | [-2.14, -2.01]                                | $[1 \times 10^{-10}, 1 \times 10^{-9}]$ |                                         |                                        |                                          |
|            | FTi       | [1.96, 2.22]                                  | $[1 \times 10^{-10}, 1 \times 10^{-9}]$ |                                         |                                        |                                          |
| Hind leg   | ThC pitch | [2.69, 2.53]                                  | $[1 \times 10^{-10}, 5 \times 10^{-9}]$ |                                         |                                        |                                          |
|            | CTr pitch | [-2.14, -1.55]                                | $[1 \times 10^{-10}, 1 \times 10^{-9}]$ |                                         |                                        |                                          |
|            | FTi       | [1.43, 2.26]                                  | $[1 \times 10^{-10}, 1 \times 10^{-9}]$ |                                         |                                        |                                          |

934 **6 Supplementary Figures**

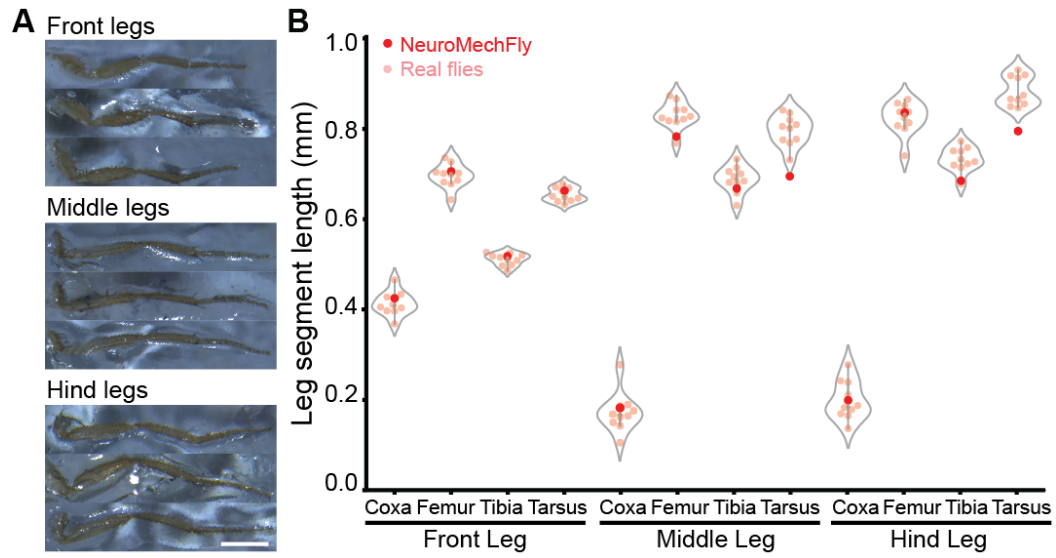

935

936 **Figure S1: Leg segment lengths for real female *Drosophila melanogaster* and NeuroMechFly.** (A) Legs  
937 were dissected, straightened, and fixed onto a glass slide for measurements. Scale bar is 0.5mm. (B) The lengths of leg  
938 segments from 1-3 dpe animals (pink) and NeuroMechFly (red) are shown. Violin plots indicate median, upper, and  
939 lower quartiles.

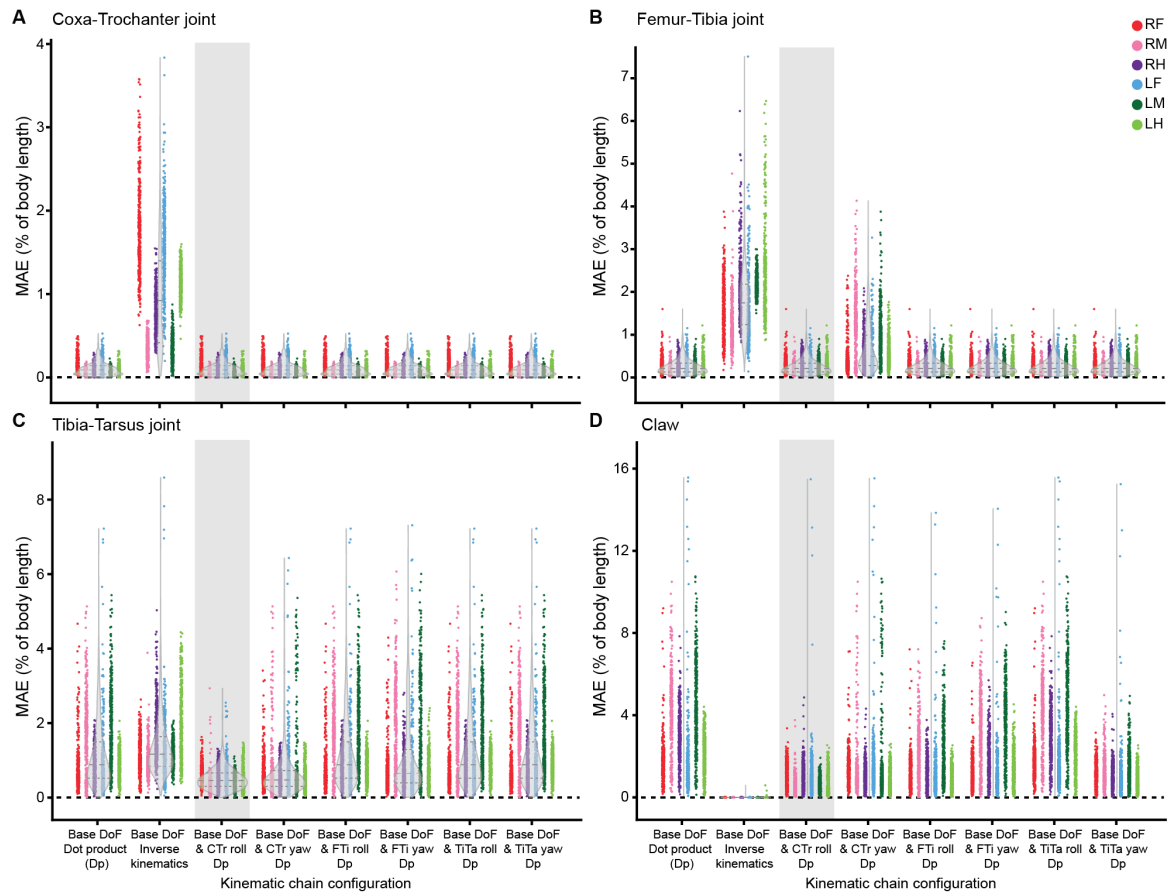

941

942 **Figure S2: The position error for every joint in the distal leg during walking as a function of kinematic**  
 943 **chain configuration.** Body-length normalized mean absolute errors (MAE) comparing measured 3D poses and  
 944 angle-derived joint positions during walking. Errors are compared among different DoF configurations for (A)  
 945 Coxa-Trochanter joints, (B) Femur-Tibia joints, (C) Tibia-Tarsus joints, and (D) Claw positions. For each condition,  $n =$   
 946 2400 samples were computed across all six legs from 4s of 100 Hz video data. Data for each leg are color-coded. 'R' and  
 947 'L' indicate right and left legs, respectively. 'F', 'M', and 'H' indicate front, middle, and hind legs, respectively. Violin  
 948 plots indicate median, upper, and lower quartiles (dashed lines). Results from adding a coxa-trochanter roll DoF to  
 949 based DoFs are highlighted in light gray.

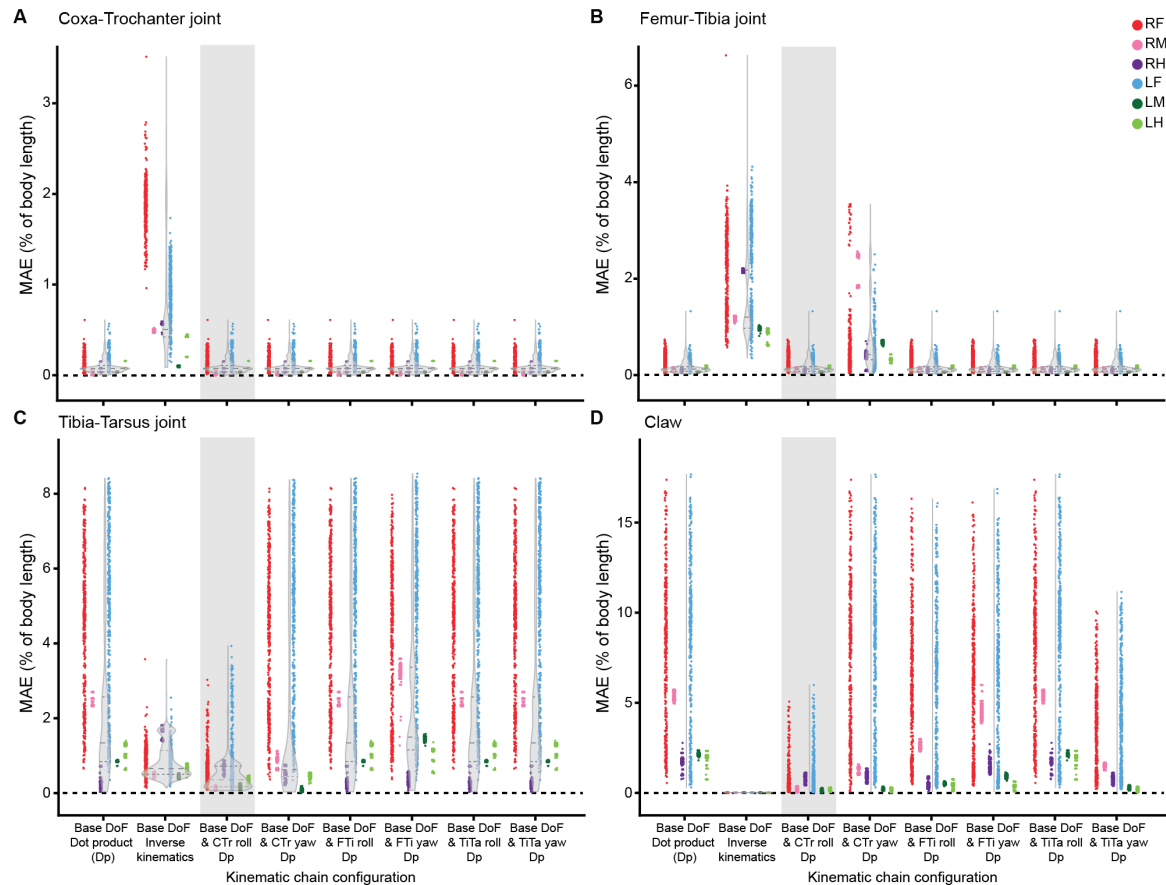

951

952 **Figure S3: The position error for every joint in the distal leg during grooming as a function of kinematic**  
 953 **chain configuration.** Body-length normalized mean absolute errors (MAE) comparing measured 3D poses and angle-  
 954 **derived joint positions during grooming.** Errors are compared among different DoF configurations for (A) Coxa-  
 955 **Trochanter joints, (B) Femur-Tibia joints, (C) Tibia-Tarsus joints, and (D) Claw positions.** For each condition, n =  
 956 **2400 samples were computed across all six legs from 4s of 100 Hz video data.** Data for each leg are color-coded. 'R' and  
 957 **'L' indicate right and left legs, respectively. 'F', 'M', and 'H' indicate front, middle, and hind legs, respectively.** Violin  
 958 **plots indicate median, upper, and lower quartiles (dashed lines).** Results from adding a coxa-trochanter roll DoF to  
 959 **based DoFs are highlighted in light gray.**

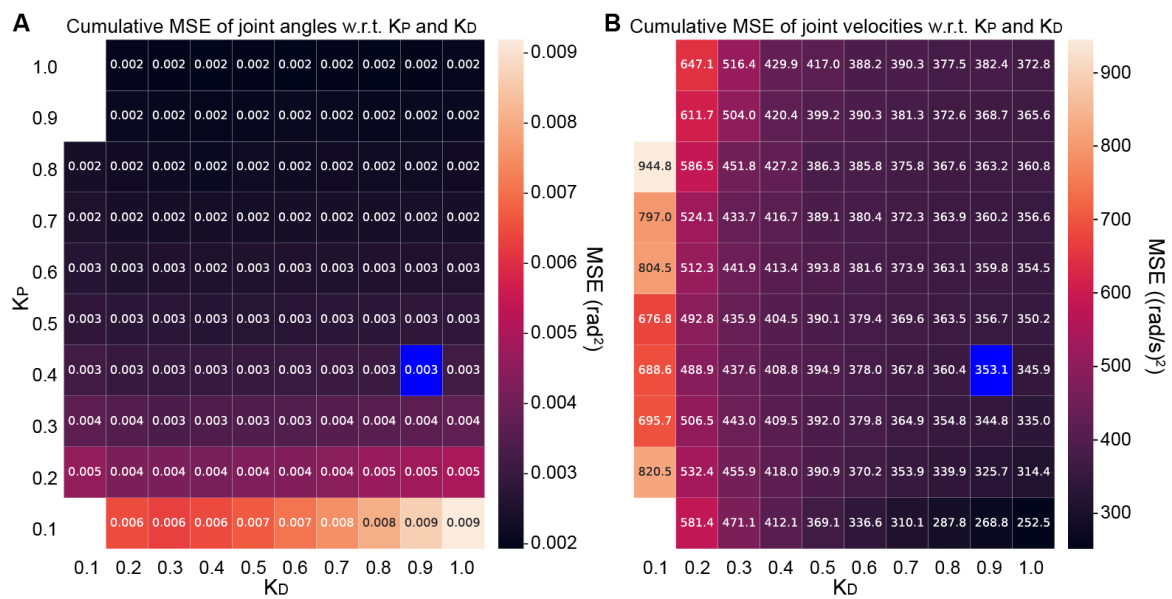

961

962 Figure S4: Mean squared error between tracked and simulated joint positions and velocities as a  
 963 function of position and velocity gain values. MSE of (A) joint angles and (B) joint velocities as a function of  
 964 derivative ( $K_d$ ) and positional gain ( $K_p$ ). Selected  $K_p$  and  $K_d$  values are indicated in blue. White areas indicate  $K_p$   
 965 and  $K_d$  pairs rendering the simulation nonfunctional.

**Varying proportional gain with a fixed derivative gain**

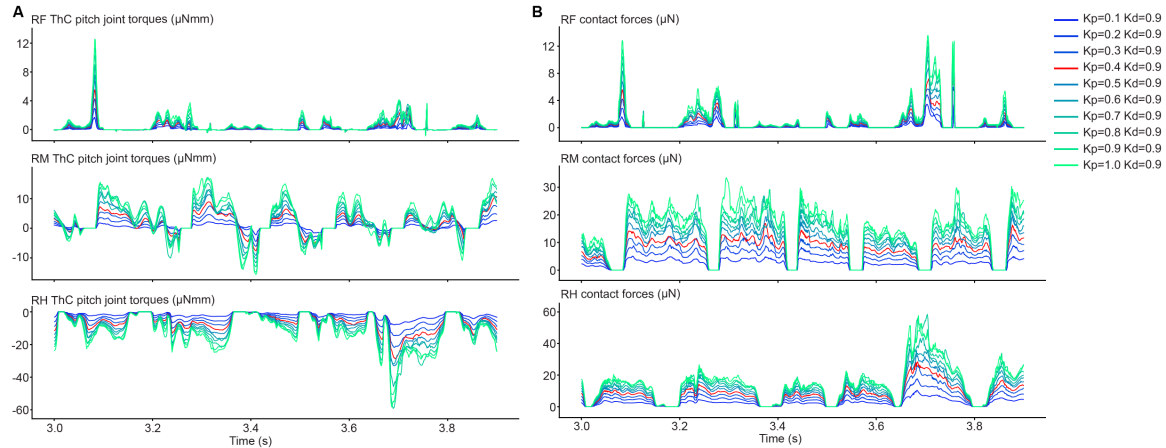

**Varying derivative gain with a fixed proportional gain**

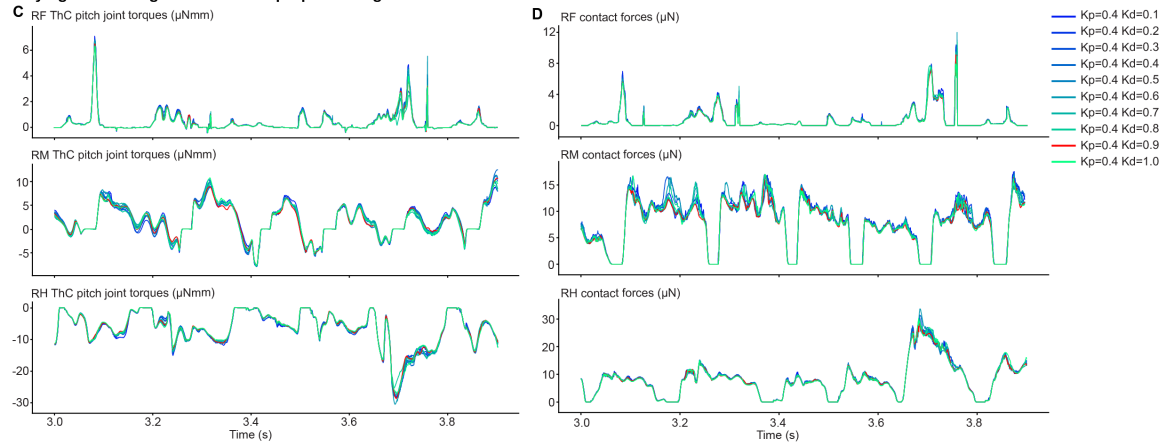

967

968 **Figure S5: Sensitivity of estimated joint torques and contact forces to proportional and derivative gains.**  
 969 **(A)** Estimated torques during forward walking as a function of proportional gain ( $K_p$ ). The derivative gain ( $K_d$ ) is  
 970 fixed at 0.9. Shown are measurements of ThC pitch torques for the right legs. Measurements for the contralateral  
 971 legs were nearly symmetrically identical and are not shown. **(B)** Contact force measurements of the right legs during  
 972 forward walking as a function of  $K_p$  values. Results from the selected  $K_p$  and  $K_d$  values are shown in red. **(C)**  
 973 Estimated torques during forward walking as a function of derivative gain ( $K_d$ ). The proportional gain ( $K_p$ ) is fixed  
 974 at 0.4. Shown are measurements of ThC pitch torques for the right legs. Measurements for the contralateral legs were  
 975 nearly symmetrically identical and are not shown. **(D)** Contact force measurements of the right legs during forward  
 976 walking as a function of  $K_d$ . Results from the selected  $K_p$  and  $K_d$  values are shown in red.

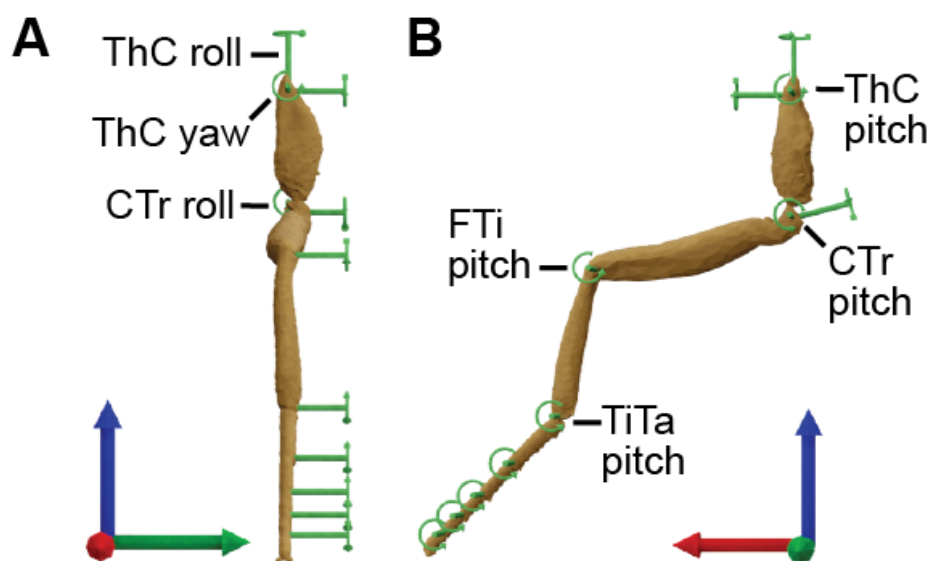

978

979 Figure S6: Leg joint degrees-of-freedom and their rotational axes. Each leg is composed of 11 hinge joints.  
980 Joints with more than one DoF were modeled as a union of multiple hinge joints. The left foreleg observed from (A)  
982 front and (B) side views. The global coordinate system's x, y, and z axes are red, green, and blue, respectively.

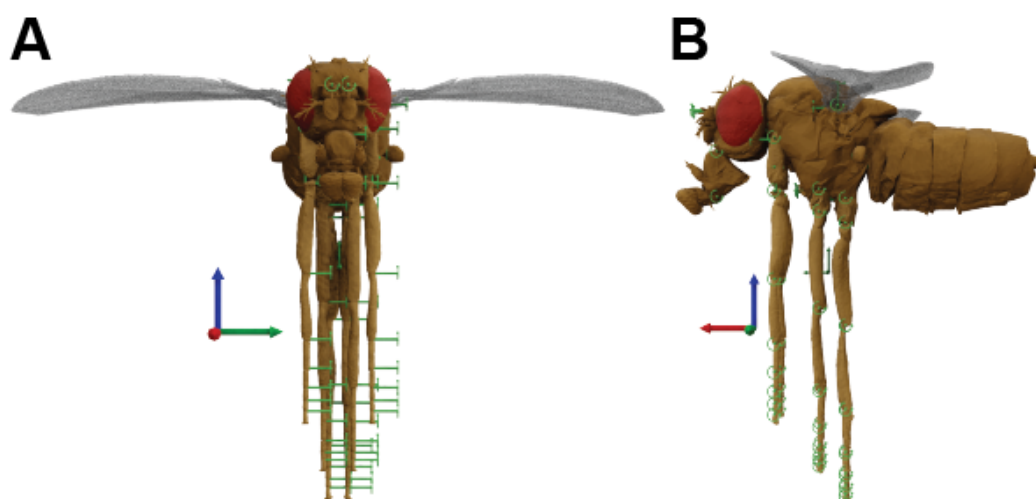

983

984 Figure S7: The 'zero pose' of NeuroMechFly. Each body segment (Table 1) is aggregated using hinge joints.  
985 Rotational axes of joints are shown. (A) Zero pose from (A) front and (B) side views. The global coordinate system's  
986 x, y, and z axes are shown (red, green, and blue, respectively).

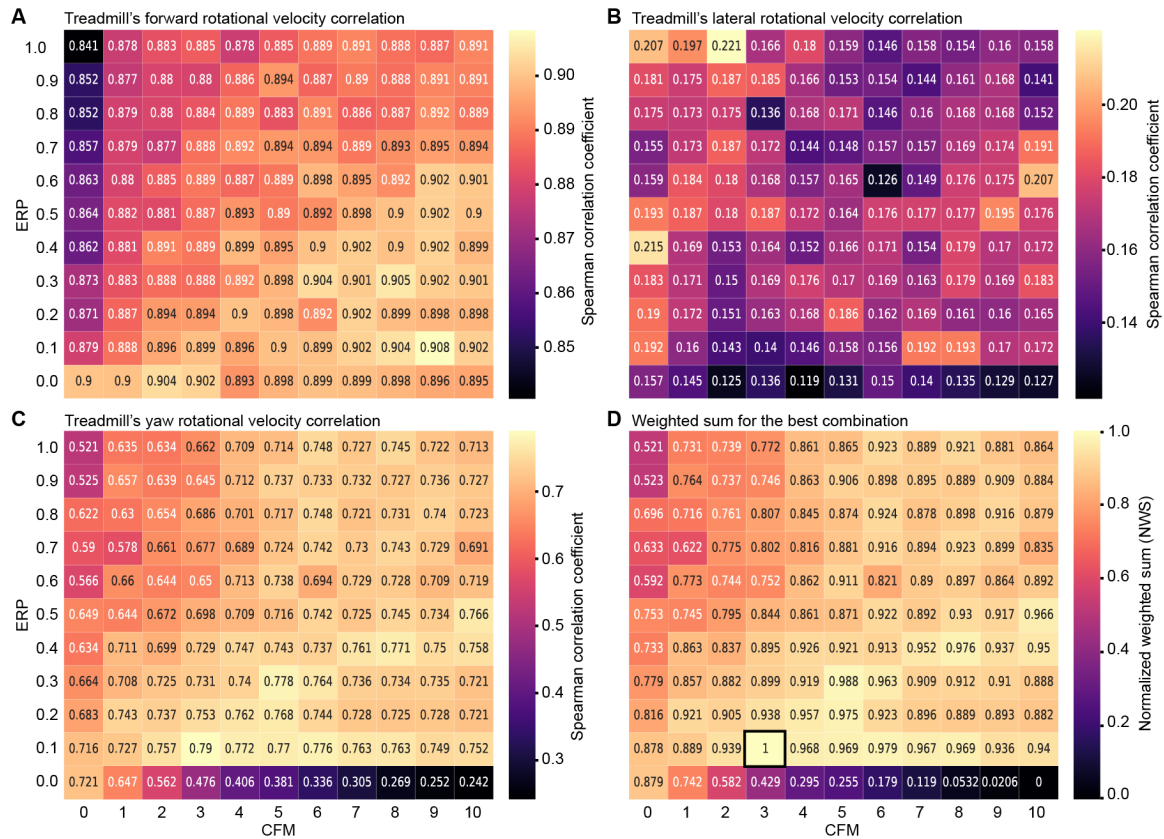

988

989 **Figure S8: Sensitivity of simulated spherical treadmill rotation prediction accuracy during tethered**  
 990 **walking to ERP and CFM constraint parameters.** Spherical treadmill rotational velocities resulting from  
 991 Kinematic Replay of walking depend on simulation constraint parameters. Shown are Spearman correlation coefficients  
 992 computed between measured and estimated treadmill rotational velocities for (A) forward, (B) lateral, and (C) yaw  
 993 axes when varying the simulation's error reduction parameter (ERP), and the constraint force mixing (CFM). (D)  
 994 The best combination of ERP and CFM—0.1 and 3, respectively (black outline)—was selected through a normalized  
 995 weighted sum (NWS) of the correlation coefficients for each axis.



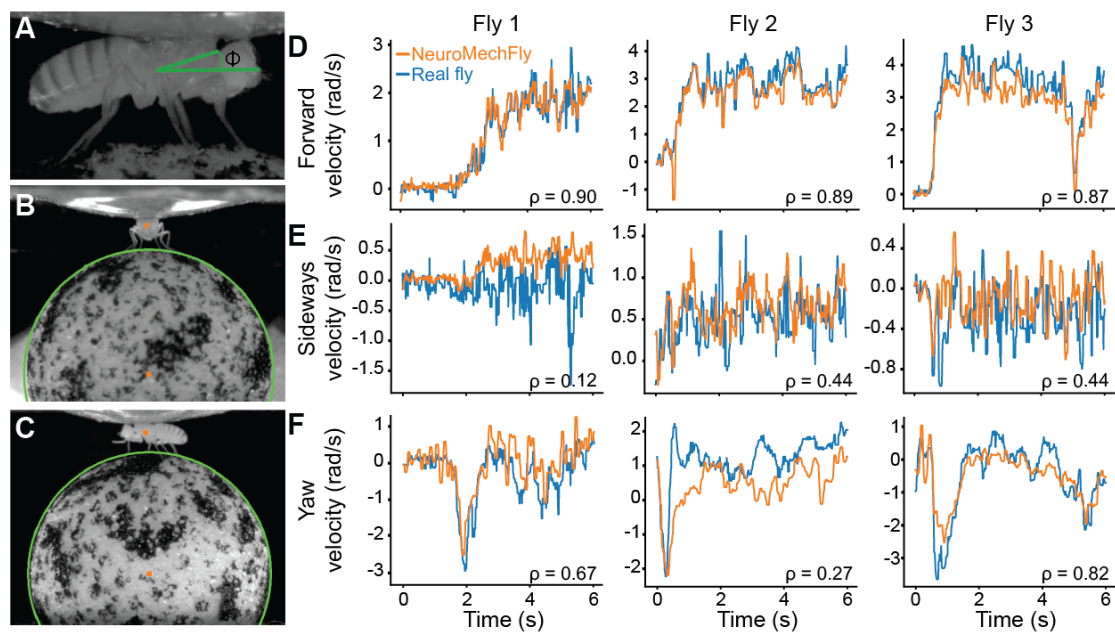

Figure S9: Comparing real to simulated spherical treadmill rotational velocities during tethered walking. Spherical treadmill rotations depend on a tethered fly's (A) inclination ( $\Phi$ , green), (B) lateral, and (C) longitudinal positions with respect to the ball (green outlines). These positions (orange dots) were automatically detected and recreated in the simulation. Rotational velocities of the spherical treadmill generated by three real flies (blue) were compared with those generated by NeuroMechFly (orange) for (D) forward, (E) lateral, and (F) yaw axes. Spearman correlation coefficients ( $\rho$ ) comparing blue and orange traces are indicated.

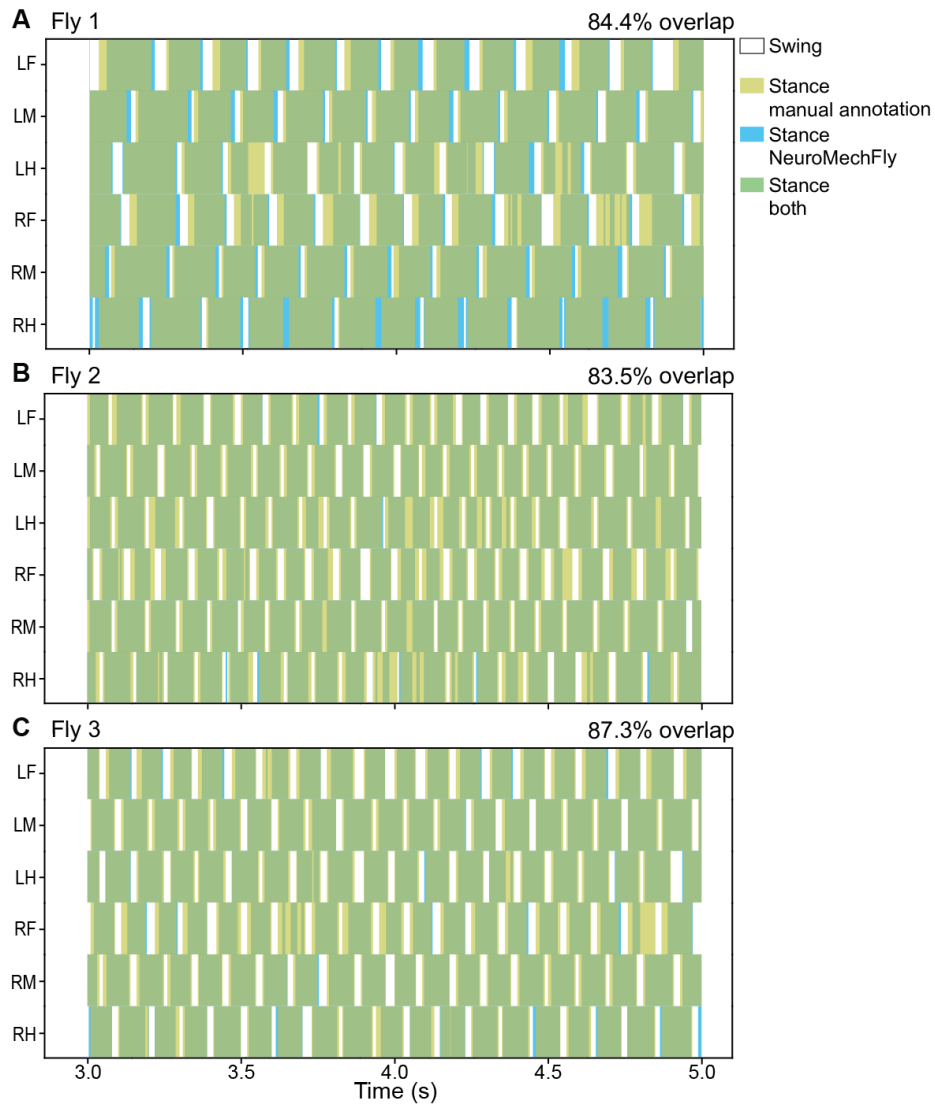

1005

1006 **Figure S10: Comparing real and simulation predictions for gait diagrams during tethered walking.** Gait  
1007 diagrams showing manually-annotated stance phases for three real flies (**A-C**, gold) as well as those obtained from  
1008 estimated ground reaction forces in NeuroMechFly (blue). Percentage of overlap in real and simulated stance phases  
1009 (green) is quantified. 'R' and 'L' indicate right and left legs, respectively. 'F', 'M', and 'H' indicate front, middle, and  
1010 hind legs, respectively.

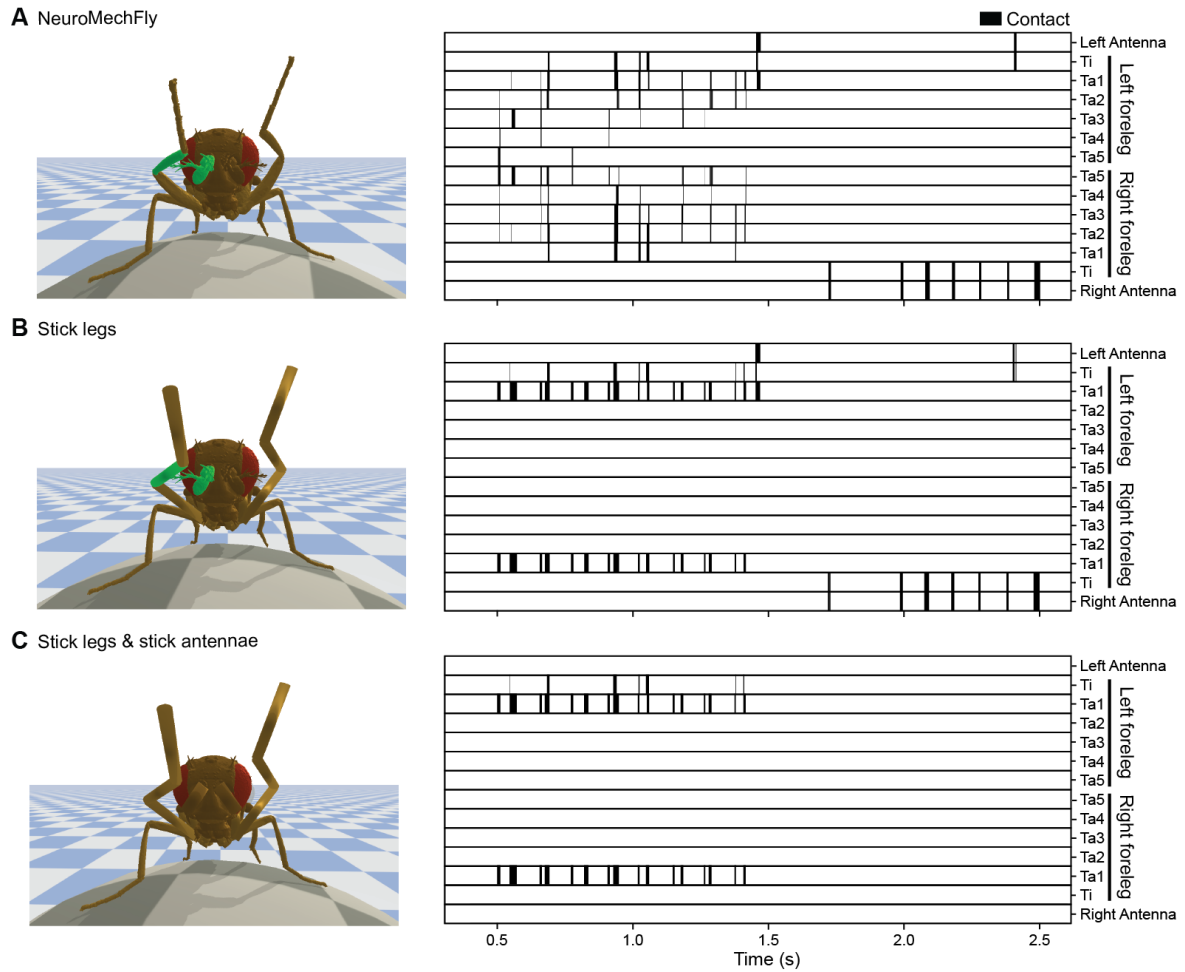

1012

1013 **Figure S11: The impact of the morphological realism on estimates of leg-leg and leg-antenna**  
 1014 **during grooming.** Collision diagrams from kinematic replay of foreleg/antennal grooming when using either (A)  
 1015 NeuroMechFly's morphologically detailed legs and antennae, or after replacing its (B) forelegs, or (C) forelegs and  
 1016 antennae with simple cylinders, as in a conventional stick skeletal model.

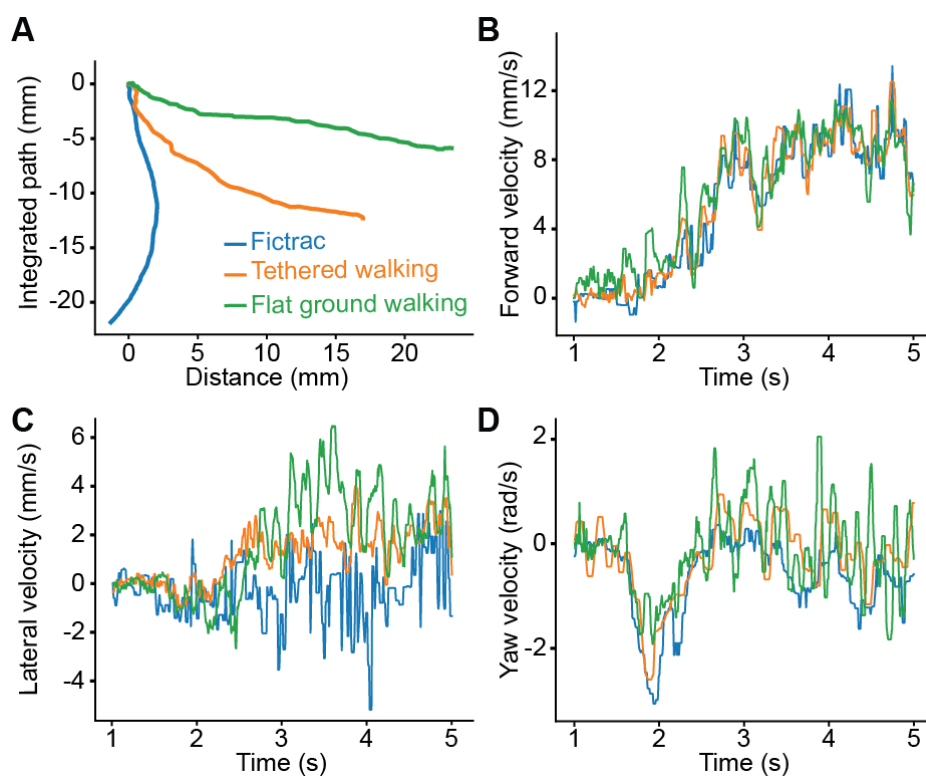

1018

1019 **Figure S12: Comparison of walking paths and velocities for real tethered walking versus kinematic**  
1020 **replay in a tethered or untethered model.** Leg kinematics from a tethered walking experiment (blue) were used  
1021 for kinematic replay in NeuroMechFly either tethered on a simulated spherical treadmill (orange) or freely walking on  
1022 flat ground (green). Shown are resulting (A) integrated walking paths, as well as associated (B) forward, (C) lateral,  
1023 and (D) yaw velocities.

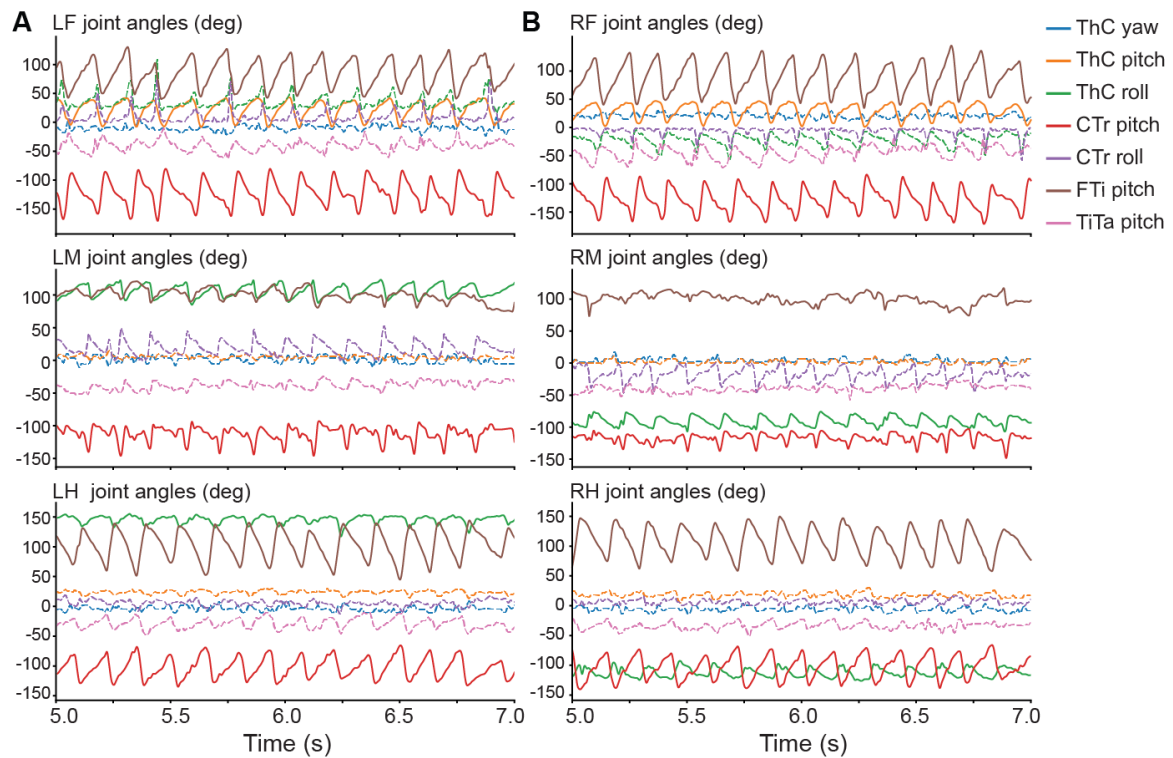

1025

1026 **Figure S13: Measured joint angles during real forward walking.** Joint angles for the (A) left and (B) right  
1027 legs measured from a real fly during forward walking. Only the three DoFs with the highest amplitudes (solid lines)  
1028 were controlled during optimization. These were: for the front legs: ThC pitch, CTr pitch, and FTi pitch; for the  
1029 middle and hind legs: ThC roll, CTr pitch, and FTi pitch DoFs. The remaining four DoFs (dashed lines) for each leg  
1030 did not exhibit pronounced angular changes and were fixed to their mean values during optimization.

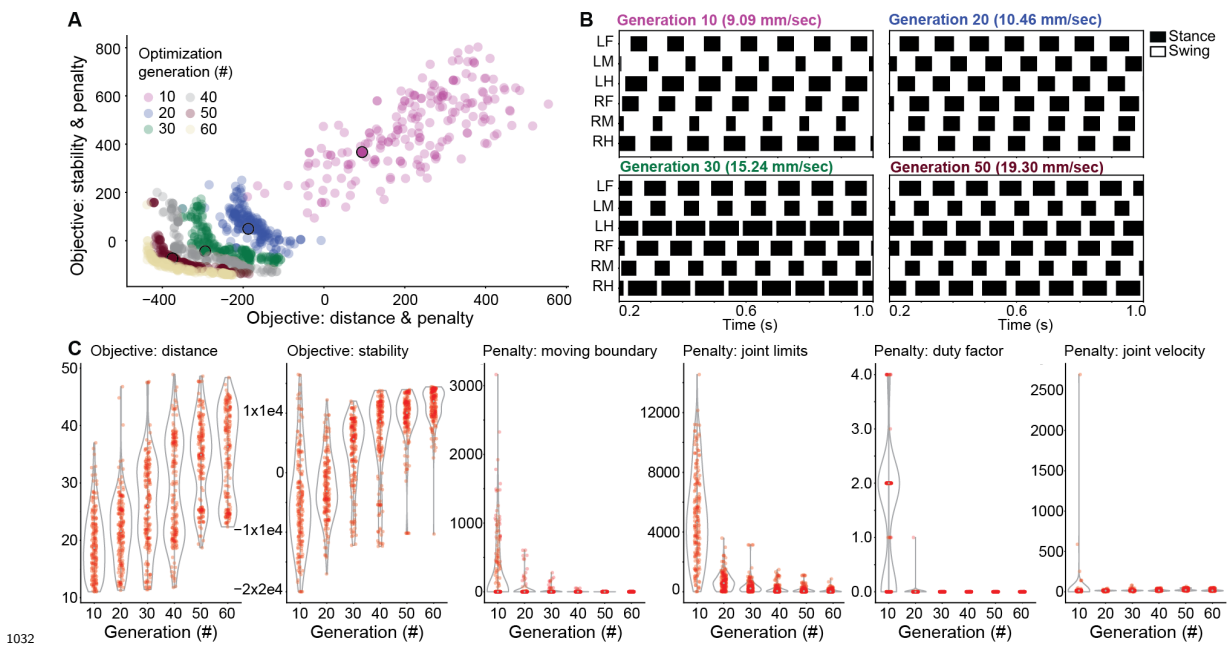

1033 **Figure S14: Objectives, penalties, and individual solutions over generations when optimizing for fast**  
 1034 **and statically stable tethered walking.** (A) Pareto front approximations for six optimization generations. Later  
 1035 generations are more negative because the optimizer aims to minimize the distance and stability objective functions,  
 1036 whose signs are inverted. Four individual solutions dominated by the pareto optimal solutions were selected for more  
 1037 in-depth analysis (10th (purple), 20th (blue), 30th (green), and 50th (dark red); all are outlined in black). (B) Gait  
 1038 diagrams from selected solutions. Stance (black) and swing (white) phases were calculated by reading-out tarsal ground  
 1039 contacts for each leg. Indicated are the velocities of each solution as calculated by averaging the spherical treadmill  
 1040 forward velocity. (C) Progression of weighted objective values (shown without sign inversion) and penalties over the  
 1041 course of 60 generations. Objectives (distance and stability coefficients) increase across generations, while penalties  
 1042 decrease or converge to, or near, zero. The objective distance (mm) is the distance traveled in 2 s. The penalty duty  
 1043 factor is the number of legs violating the duty factor constraint. The remaining penalties are shown in Arbitrary Units.

## 1045 7 Supplementary Videos

1046 **Video 1: Constructing a data-driven biomechanical model of adult *Drosophila*.** An adult  
1047 female fly is encased in resin for x-ray microtomography. The resulting x-ray microtomography  
1048 data reveals cuticle, muscles, nervous tissues, and internal organs. These data are thresholded to  
1049 separate the foreground from background. Then the exoskeleton is voxelized into a 3-dimensional  
1050 polygon mesh. Articulated body segments are separated from one another and then reassembled into  
1051 a natural pose. Bones are added and rigged to permit actuation. Finally, textures are added to the  
1052 model for visualization purposes.

1053 <https://www.dropbox.com/s/pkbh4o81bdomx1x/Video1.mov?dl=0>

1054 **Video 2: Visualization of possible additional leg degrees-of-freedom.** NeuroMechFly's left-  
1055 middle leg is sequentially actuated along DoFs that are later analyzed to test their requirement for  
1056 accurate replay of real fly leg kinematics. The articulated joint (e.g., 'CTr') and type of movement  
1057 ('roll') are indicated.

1058 <https://www.dropbox.com/s/8uhi9cyzhdnty4/Video2.mov?dl=0>

1059 **Video 3: The effect of additional degrees-of-freedom on the accuracy of replaying forward  
1060 walking.** Measured 3D poses (solid lines) and forward kinematic replay (dashed lines) for forward  
1061 walking. Forward kinematics are determined either (**top-left**) using no additional degrees-of-freedom  
1062 (Base DoF, dot product), (**top-middle**) instead using inverse kinematics to optimize joint angles and  
1063 minimize error with only base degrees-of-freedom (Base DoF, inverse kinematics), or (**top-right and  
1064 bottom row**) by adding a single new DoF (BaseDoF & 'joint' 'DoF'). Legs are color-coded.

1065 <https://www.dropbox.com/s/3f23rdpvz7os640/Video3.mov?dl=0>

1066 **Video 4: The effect of additional degrees-of-freedom on the accuracy of replaying fore-  
1067 leg/antennal grooming.** Measured 3D poses (solid lines) and forward kinematic replay (dashed  
1068 lines) for foreleg/antennal grooming. Forward kinematics are determined either (**top-left**) using no  
1069 additional degrees-of-freedom (Base DoF, dot product), (**top-middle**) instead using inverse kine-  
1070 matics to optimize joint angles and minimize error with only base degrees-of-freedom (Base DoF,  
1071 inverse kinematics), or (**top-right and bottom row**) by adding a single new DoF (BaseDoF &  
1072 'joint' 'DoF'). Legs are color-coded.

1073 <https://www.dropbox.com/s/zv860h9ic2r8li2/Video4.mov?dl=0>

1074 **Video 5: Kinematic replay of *Drosophila* forward walking using NeuroMechFly. (top-  
1075 left, 'Raw data')** A tethered adult fly is shown walking on a spherical treadmill. One of six  
1076 synchronized camera views is shown. Data are replayed at 0.2x real time. (**bottom-left, '2D  
1077 tracking'**) 2D poses (filled circles) and connecting 'bones' (lines) are superimposed for the proximal  
1078 three legs. (**bottom-right, '3D reconstruction'**) These six 2D poses are triangulated to obtain  
1079 3D poses. Overlaid are triangulated 3D poses (solid lines) and 3D poses obtained by solving forward  
1080 kinematics from joint angles (dashed lines). (**top-right, 'Kinematic replay'**) These 3D joint angles  
1081 actuate NeuroMechFly leg movements while it walks on a simulated spherical treadmill. Tarsal  
1082 contacts with the ground are indicated (green). Estimated ground reaction force vectors for the  
1083 proximal three legs are superimposed on the original video data (**top-left**).

1084 <https://www.dropbox.com/s/iieuwgm8bazzmd/Video5.mov?dl=0>

1085 **Video 6: Kinematic replay of *Drosophila* foreleg/antennal grooming using NeuroMech-  
1086 Fly. (top-left, 'Raw data')** A tethered adult fly is shown grooming on a spherical treadmill. One  
1087 of six synchronized camera views is shown. Data are replayed at 0.2x real time. (**bottom-left, '2D  
1088 tracking'**) 2D poses (filled circles) and connecting 'bones' (lines) are superimposed for the proximal  
1089 three legs. (**bottom-right, '3D reconstruction'**) These six 2D poses are triangulated to obtain  
1090 3D poses. Overlaid are triangulated 3D poses (solid lines) and 3D poses obtained by solving forward  
1091 kinematics from joint angles (dashed lines). (**top-right, 'Kinematic replay'**) These joint angles  
1092 actuate NeuroMechFly leg movements while it grooms on a simulated spherical treadmill. Leg seg-  
1093 ments and antennal collisions are indicated (green). Estimated collision force vectors for the front  
1094 legs and antennae are subsequently superimposed on the original video data (**top-left**).

1095 <https://www.dropbox.com/s/m3j6wfevzenhfkn/Video6.mov?dl=0>

1096 **Video 7: The influence of leg and antenna morphological detail on collision predic-**  
1097 **tions. (top-left, ‘Raw data’)** Real fly grooming as recorded from the front camera. **(top-right,**  
1098 **‘NeuroMechFly’)** NeuroMechFly performing kinematic replay of grooming. **(bottom-left, ‘Stick**  
1099 **model legs’)** NeuroMechFly with stick legs but detailed antennae. **(bottom-right, ‘Stick model**  
1100 **legs and antennae’)** NeuroMechFly with stick legs and stick antennae.  
1101 <https://www.dropbox.com/s/7wpmf2a8s4pzi65/Video7.mov?dl=0>

1102 **Video 8: Kinematic replay of tethered *Drosophila* forward walking using NeuroMechFly**  
1103 **on flat terrain without body support. (Right)** Pose estimates obtained from a real tethered fly  
1104 walking on a spherical treadmill are replayed in NeuroMechFly as it walks untethered on flat terrain  
1105 without body support. **(Left)** Integrated paths are shown for tethered (orange) and flat ground  
1106 (green) scenarios.  
1107 <https://www.dropbox.com/s/e7qvz4tm1exhefl/Video8.mov?dl=0>

1108 **Video 9: Forward walking across optimization generations.** Forward walking for four solu-  
1109 tions shown across optimization generations 15, 30, 45 and 60. Tarsal contacts with the ground are  
1110 indicated (green). Videos are replayed at 0.1x real time. Solutions shown are: (top-left) a random  
1111 individual, (top-right) the fastest individual (i.e., with the longest distance traveled), (bottom-left)  
1112 the most stable individual, and (bottom-right) the best trade-off achieving both high speed and static  
1113 stability.  
1114 <https://www.dropbox.com/s/lizgd3ss2yftlxb/Video9.mov?dl=0>

1115 **Video 10: Replaying real tethered walking kinematics on flat terrain and applying ex-**  
1116 **ternal perturbations.** Pose estimates obtained from a real tethered fly walking on a spherical  
1117 treadmill are replayed in NeuroMechFly as it walks untethered on flat terrain without body support.  
1118 Simulated spheres are projected at the model to illustrate perturbations and the possibility of using  
1119 more complex physical environments in PyBullet.  
1120 <https://www.dropbox.com/s/ae6zrejhdwduun/Video10.mov?dl=0>

## 1121 8 Code and data availability

1122 Data are available at:  
1123 <https://doi.org/10.7910/DVN/Y3TAEC>

1124  
1125 Code, and documentation are available at:  
1126 <https://github.com/NeLy-EPFL/NeuroMechFly>  
1127 <https://nely-epfl.github.io/NeuroMechFly>

## 1129 9 Funding

1130 PR acknowledges support from an SNSF Project Grant (175667), and an SNSF Eccellenza Grant  
1131 (181239). VLR acknowledges support from the Mexican National Council for Science and Technol-  
1132 ogy, CONACYT, under the grant number 709993. ST acknowledges support from the European  
1133 Union’s Horizon 2020 research and innovation program under grant agreement nos. 720270 (SGA1),  
1134 785907 (SGA2). PGO acknowledges support from the Swiss Government Excellence Scholarship  
1135 for Doctoral Studies. JA acknowledges support from the Human Frontier Science Program (HFSP-  
1136 RGP0027/2017).

## 1137 10 Acknowledgments

1138 We thank Stéphanie Clerc Rosset and Graham Knott (Biological Electron Microscopy Facility, EPFL,  
1139 Lausanne, Switzerland) for preparing *Drosophila melanogaster* samples for X-ray microtomography.  
1140 We thank Halla Sigurthorsdottir for early work on fly leg degrees-of-freedom.



## 11 Author Contributions

V.L.R. - Conceptualization, Methodology, Software, Validation, Formal Analysis, Investigation, Data Curation, Validation, Writing – Original Draft Preparation, Writing – Review & Editing, Visualization.

S.T.R. - Conceptualization, Methodology, Software, Validation, Writing – Review & Editing, Visualization.

P.G.O. - Conceptualization, Methodology, Software, Validation, Formal Analysis, Investigation, Data Curation, Writing – Review & Editing, Visualization.

J.A. - Conceptualization, Methodology, Software, Validation, Writing – Review & Editing.

A.J.I. - Conceptualization, Methodology, Resources, Writing - Review & Editing, Supervision, Project Administration, Funding Acquisition.

P.R. - Conceptualization, Methodology, Resources, Writing – Original Draft Preparation, Writing - Review & Editing, Supervision, Project Administration, Funding Acquisition.

## 12 Competing interests

The authors declare that no competing interests exist.

## References

[1] Chiel, H. J. & Beer, R. D. The brain has a body: adaptive behavior emerges from interactions of nervous system, body and environment. *Trends in neurosciences* **20**, 553–557 (1997).

[2] Webb, B. A framework for models of biological behaviour. *International journal of neural systems* **9**, 375–381 (1999).

[3] Pearson, K., Ekeberg, Ö. & Büschges, A. Assessing sensory function in locomotor systems using neuro-mechanical simulations. *Trends in neurosciences* **29**, 625–631 (2006).

[4] Prilutsky, B. I. & Edwards, D. H. *Neuromechanical modeling of posture and locomotion* (2015).

[5] Seth, A. *et al.* OpenSim: Simulating musculoskeletal dynamics and neuromuscular control to study human and animal movement. *PloS computational biology* **14** (2018).

[6] Einevoll, G. T. *et al.* The scientific case for brain simulations. *Neuron* **102**, 735–744 (2019).

[7] Sigvardt, K. A. & Miller, W. L. Analysis and modeling of the locomotor central pattern generator as a network of coupled oscillators. *Annals of the New York Academy of Sciences* **860**, 250–265 (1998).

[8] Lansner, A., Hellgren Kotaleski, J. & Grillner, S. Modeling of the spinal neuronal circuitry underlying locomotion in a lower vertebrate. *Annals of the New York Academy of Sciences* **860**, 239–249 (1998).

[9] Ijspeert, A. J. A connectionist central pattern generator for the aquatic and terrestrial gaits of a simulated salamander. *Biological cybernetics* **84**, 331–348 (2001).

[10] Rybak, I. A., Dougherty, K. J. & Shevtsova, N. A. Organization of the mammalian locomotor CPG: review of computational model and circuit architectures based on genetically identified spinal interneurons. *ENeuro* **2** (2015).

[11] Ekeberg, Ö., Blümel, M. & Büschges, A. Dynamic simulation of insect walking. *Arthropod structure & development* **33**, 287–300 (2004).

[12] Toth, T. I., Schmidt, J., Büschges, A. & Daun-Gruhn, S. A neuro-mechanical model of a single leg joint highlighting the basic physiological role of fast and slow muscle fibres of an insect muscle system. *PloS one* **8** (2013).

- 1184 [13] Toth, T. I., Grabowska, M., Schmidt, J., Büschges, A. & Daun-Gruhn, S. A neuro-mechanical  
1185 model explaining the physiological role of fast and slow muscle fibres at stop and start of stepping  
1186 of an insect leg. *PloS one* **8** (2013).
- 1187 [14] Schilling, M., Hoinville, T., Schmitz, J. & Cruse, H. Walknet, a bio-inspired controller for  
1188 hexapod walking. *Biological cybernetics* **107**, 397–419 (2013).
- 1189 [15] Szczecinski, N. S., Brown, A. E., Bender, J. A., Quinn, R. D. & Ritzmann, R. E. A neuromechanical  
1190 simulation of insect walking and transition to turning of the cockroach *Blaberus discoidalis*.  
1191 *Biological cybernetics* **108**, 1–21 (2014).
- 1192 [16] Proctor, J., Kukillaya, R. & Holmes, P. A phase-reduced neuro-mechanical model for insect  
1193 locomotion: feed-forward stability and proprioceptive feedback. *Philosophical Transactions of  
1194 the Royal Society A: Mathematical, Physical and Engineering Sciences* **368**, 5087–5104 (2010).
- 1195 [17] Szczecinski, N. S., Martin, J. P., Bertsch, D. J., Ritzmann, R. E. & Quinn, R. D. Neuromechanical  
1196 model of praying mantis explores the role of descending commands in pre-strike pivots.  
1197 *Bioinspiration & biomimetics* **10** (2015).
- 1198 [18] Guo, S., Lin, J., Wöhrle, T. & Liao, M. A Neuro-Musculo-Skeletal Model for Insects With  
1199 Data-driven Optimization. *Scientific reports* **8**, 1–11 (2018).
- 1200 [19] Szigeti, B. *et al.* OpenWorm: an open-science approach to modeling *Caenorhabditis elegans*.  
1201 *Frontiers in computational neuroscience* **8**, 137 (2014).
- 1202 [20] Izquierdo, E. J. & Beer, R. D. From head to tail: a neuromechanical model of forward locomotion  
1203 in *Caenorhabditis elegans*. *Philosophical Transactions of the Royal Society B: Biological Sciences*  
1204 **373** (2018).
- 1205 [21] Loveless, J., Lagogiannis, K. & Webb, B. Modelling the mechanics of exploration in larval  
1206 *Drosophila*. *PloS computational biology* **15** (2019).
- 1207 [22] Merel, J. *et al.* Deep neuroethology of a virtual rodent. *arXiv* (2019).
- 1208 [23] Isakov, A. *et al.* Recovery of locomotion after injury in *Drosophila melanogaster* depends on  
1209 proprioception. *Journal of Experimental Biology* **219**, 1760–1771 (2016).
- 1210 [24] Ramdya, P. *et al.* Climbing favours the tripod gait over alternative faster insect gaits. *Nature  
1211 communications* **8** (2017).
- 1212 [25] Seeds, A. M. *et al.* A suppression hierarchy among competing motor programs drives sequential  
1213 grooming in *Drosophila*. *eLife* **3** (2014).
- 1214 [26] Pavlou, H. J. & Goodwin, S. F. Courtship behavior in *Drosophila melanogaster*: towards a  
1215 ‘courtship connectome’. *Current Opinion in Neurobiology* **23**, 76–83 (2013).
- 1216 [27] Fry, S. N., Sayaman, R. & Dickinson, M. H. The aerodynamics of free-flight maneuvers in  
1217 *Drosophila*. *Science* **300**, 495–498 (2003).
- 1218 [28] Mendes, C. S., Bartos, I., Akay, T., Márka, S. & Mann, R. S. Quantification of gait parameters  
1219 in freely walking wild type and sensory deprived *Drosophila melanogaster*. *eLife* **2** (2013).
- 1220 [29] Wosnitza, A., Bockemühl, T., Dübbert, M., Scholz, H. & Büschges, A. Inter-leg coordination  
1221 in the control of walking speed in *Drosophila*. *Journal of Experimental Biology* **216**, 480–491  
1222 (2013).
- 1223 [30] Pick, S. & Strauss, R. Goal-driven behavioral adaptations in gap-climbing *Drosophila*. *Current  
1224 Biology* **15**, 1473–1478 (2005).
- 1225 [31] Pereira, T. D. *et al.* Fast animal pose estimation using deep neural networks. *Nature methods*  
1226 **16**, 117–125 (2019).
- 1227 [32] Mathis, A. *et al.* DeepLabCut: markerless pose estimation of user-defined body parts with deep  
1228 learning. *Nature neuroscience* **21**, 1281–1289 (2018).

- 1229 [33] Günel, S. *et al.* DeepFly3D, a deep learning-based approach for 3D limb and appendage tracking  
1230 in tethered, adult *Drosophila*. *eLife* **8** (2019).
- 1231 [34] Gosztolai, A. *et al.* LiftPose3D, a deep learning-based approach for transforming two-dimensional  
1232 to three-dimensional poses in laboratory animals. *Nature methods* **18**, 975–981 (2021).
- 1233 [35] Jenett, A. *et al.* A GAL4-driver line resource for *Drosophila* neurobiology. *Cell reports* **2**,  
1234 991–1001 (2012).
- 1235 [36] Seelig, J. D. *et al.* Two-photon calcium imaging from head-fixed *Drosophila* during optomotor  
1236 walking behavior. *Nature methods* **7**, 535 (2010).
- 1237 [37] Maimon, G., Straw, A. D. & Dickinson, M. H. Active flight increases the gain of visual motion  
1238 processing in *Drosophila*. *Nature neuroscience* **13**, 393 (2010).
- 1239 [38] Chen, C.-L. *et al.* Imaging neural activity in the ventral nerve cord of behaving adult *Drosophila*.  
1240 *Nature communications* **9** (2018).
- 1241 [39] Hermans, L. *et al.* Long-term imaging of the ventral nerve cord in behaving adult *Drosophila*.  
1242 *bioRxiv* (2021).
- 1243 [40] Phelps, J. S. *et al.* Reconstruction of motor control circuits in adult *Drosophila* using automated  
1244 transmission electron microscopy. *Cell* **184**, 759–774 (2021).
- 1245 [41] Scheffer, L. K. *et al.* A Connectome and Analysis of the Adult *Drosophila* Central Brain. *bioRxiv*  
1246 (2020).
- 1247 [42] Coumans, E. Bullet physics simulation. In *ACM SIGGRAPH 2015 Courses* (2015).
- 1248 [43] Lewiner, T., Lopes, H., Vieira, A. W. & Tavares, G. Efficient Implementation of Marching  
1249 Cubes' Cases with Topological Guarantees. *Journal of Graphics Tools* **8**, 1–15 (2003).
- 1250 [44] Soler, C., Daczewska, M., Da Ponte, J. P., Dastugue, B. & Jagla, K. Coordinated development  
1251 of muscles and tendons of the *Drosophila* leg. *Development* **131**, 6041–6051 (2004).
- 1252 [45] Sink, H. *Muscle development in drosophila* (2006).
- 1253 [46] Cruse, H., Dürr, V. & Schmitz, J. Insect walking is based on a decentralized architecture revealing  
1254 a simple and robust controller. *Philosophical Transactions of the Royal Society A: Mathematical,*  
1255 *Physical and Engineering Sciences* **365**, 221–250 (2007).
- 1256 [47] Loper, M., Mahmood, N., Romero, J., Pons-Moll, G. & Black, M. J. SMPL: A skinned multi-  
1257 person linear model. *ACM transactions on graphics* **34**, 1–16 (2015).
- 1258 [48] Zuffi, S., Kanazawa, A., Jacobs, D. W. & Black, M. J. 3D menagerie: Modeling the 3D shape  
1259 and pose of animals. In *Proceedings of the IEEE conference on computer vision and pattern*  
1260 *recognition*, 6365–6373 (2017).
- 1261 [49] Li, S. *et al.* Deformation-aware Unpaired Image Translation for Pose Estimation on Laboratory  
1262 Animals. *arXiv* (2020).
- 1263 [50] Mu, J., Qiu, W., Hager, G. D. & Yuille, A. L. Learning from Synthetic Animals. In *Proceedings of*  
1264 *the IEEE/CVF Conference on Computer Vision and Pattern Recognition*, 12386–12395 (2020).
- 1265 [51] Bolaños, L. A. *et al.* A three-dimensional virtual mouse generates synthetic training data for  
1266 behavioral analysis. *Nature methods* (2021).
- 1267 [52] Watson, J. T., Ritzmann, R. E., Zill, S. N. & Pollack, A. J. Control of obstacle climbing in the  
1268 cockroach, *Blaberus discoidalis*. I. Kinematics. *Journal of Comparative Physiology A* **188**, 39–53  
1269 (2002).
- 1270 [53] Frantsevich, L. & Wang, W. Gimbals in the insect leg. *Arthropod structure & development* **38**,  
1271 16–30 (2009).

- 1272 [54] Bender, J. A., Simpson, E. M. & Ritzmann, R. E. Computer-assisted 3D kinematic analysis of  
1273 all leg joints in walking insects. *PLoS one* **5** (2010).
- 1274 [55] Zill, S. N. *et al.* Effects of force detecting sense organs on muscle synergies are correlated with  
1275 their response properties. *Arthropod structure & development* **46**, 564–578 (2017).
- 1276 [56] Cofer, D., Cymbalyuk, G., Heitler, W. J. & Edwards, D. H. Neuromechanical simulation of the  
1277 locust jump. *Journal of Experimental Biology* **213**, 1060–1068 (2010).
- 1278 [57] Moore, R. J. *et al.* Fictrac: A visual method for tracking spherical motion and generating fictive  
1279 animal paths. *Journal of Neuroscience Methods* **225**, 106–119 (2014).
- 1280 [58] Azevedo, A. W. *et al.* A size principle for recruitment of *Drosophila* leg motor neurons. *eLife* **9**  
1281 (2020).
- 1282 [59] Fuchs, E., Holmes, P., Kiemel, T. & Ayali, A. Intersegmental coordination of cockroach locomotion: adaptive control of centrally coupled pattern generator circuits. *Frontiers in neural circuits* **4**, 125 (2011).
- 1283  
1284
- 1285 [60] Mantziaris, C. *et al.* Intra-and intersegmental influences among central pattern generating networks in the walking system of the stick insect. *Journal of neurophysiology* **118**, 2296–2310  
1286 (2017).  
1287
- 1288 [61] Schilling, M. & Cruse, H. Decentralized control of insect walking: A simple neural network  
1289 explains a wide range of behavioral and neurophysiological results. *PLoS computational biology*  
1290 **16** (2020).
- 1291 [62] Ijspeert, A. J., Crespi, A., Ryczko, D. & Cabelguen, J.-M. From Swimming to Walking with a  
1292 Salamander Robot Driven by a Spinal Cord Model. *Science* **315**, 1416–1420 (2007).
- 1293 [63] Ekeberg, Ö. A combined neuronal and mechanical model of fish swimming. *Biological cybernetics*  
1294 **69**, 363–374 (1993).
- 1295 [64] Daun-Gruhn, S. A mathematical modeling study of inter-segmental coordination during stick  
1296 insect walking. *Journal of computational neuroscience* **30**, 255–278 (2011).
- 1297 [65] DeAngelis, B. D., Zavatone-Veth, J. A. & Clark, D. A. The manifold structure of limb coordination in walking *Drosophila*. *Elife* **8**, e46409 (2019).
- 1298
- 1299 [66] Oliveira, M., Santos, C. P., Costa, L., Matos, V. & Ferreira, M. Multi-objective parameter CPG  
1300 optimization for gait generation of a quadruped robot considering behavioral diversity. In *2011  
1301 IEEE/RSJ International Conference on Intelligent Robots and Systems*, 2286–2291 (2011).
- 1302 [67] Deb, K., Pratap, A., Agarwal, S. & Meyarivan, T. A fast and elitist multiobjective genetic  
1303 algorithm: NSGA-II. *IEEE transactions on evolutionary computation* **6**, 182–197 (2002).
- 1304 [68] Strauss, R. & Heisenberg, M. Coordination of legs during straight walking and turning in  
1305 *drosophila melanogaster*. *Journal of Comparative Physiology A* **167** (1990).
- 1306 [69] Takahashi, H. *et al.* Maximum force capacity of legs of a fruit fly during landing motion. In *19th International Conference on Solid-State Sensors, Actuators and Microsystems*, 1061–1064  
1307 (2017).  
1308
- 1309 [70] Elliott, C. J. & Sparrow, J. C. In vivo measurement of muscle output in intact *Drosophila*.  
1310 *Methods* **56**, 78–86 (2012).
- 1311 [71] Mamiya, A., Gurung, P. & Tuthill, J. C. Neural coding of leg proprioception in *Drosophila*.  
1312 *Neuron* **100**, 636–650 (2018).
- 1313 [72] Vincent, J. F. & Wegst, U. G. Design and mechanical properties of insect cuticle. *Arthropod  
1314 structure & development* **33**, 187–199 (2004).
- 1315 [73] Flynn, P. C. & Kaufman, W. R. Mechanical properties of the cuticle of the tick *Amblyomma  
1316 hebraeum* (Acari: Ixodidae). *Journal of Experimental Biology* **218**, 2806–2814 (2015).

- 1317 [74] Kimura, K.-i., Minami, R., Yamahama, Y., Hariyama, T. & Hosoda, N. Framework with cy-  
1318 tokeletal actin filaments forming insect footpad hairs inspires biomimetic adhesive device design.  
1319 *Communications biology* **3**, 1–7 (2020).
- 1320 [75] Kuan, A. T. *et al.* Dense neuronal reconstruction through X-ray holographic nano-tomography.  
1321 *Nature neuroscience* (2020).
- 1322 [76] Chaffey, N. Principles and techniques of electron microscopy: biological applications (2001).
- 1323 [77] Schindelin, J. *et al.* Fiji: an open-source platform for biological-image analysis. *Nature methods*  
1324 **9**, 676–682 (2012).
- 1325 [78] van der Walt, S. *et al.* scikit-image: image processing in Python. *PeerJ* **2** (2014).
- 1326 [79] Foundation, B. Blender-a 3D Modelling and Rendering Package (2012).
- 1327 [80] Ferris, G. External morphology of the adult. *Biology of Drosophila* 368–419 (1950).
- 1328 [81] Dickson, W. B., Straw, A. D. & Dickinson, M. H. Integrative Model of Drosophila Flight. *AIAA*  
1329 *Journal* **46**, 2150–2164 (2008).
- 1330 [82] Geurten, B. R. H., Jähde, P., Corthals, K. & Göpfert, M. C. Saccadic body turns in walking  
1331 Drosophila. *Frontiers in Behavioral Neuroscience* **8**, 365 (2014).
- 1332 [83] Szczecinski, N. S., Bockemühl, T., Chockley, A. S. & Büschges, A. Static stability predicts the  
1333 continuum of interleg coordination patterns in Drosophila. *Journal of Experimental Biology* **221**  
1334 (2018).
- 1335 [84] Mantziaris, C., Bockemühl, T. & Büschges, A. Central pattern generating networks in insect  
1336 locomotion. *Developmental neurobiology* **80**, 16–30 (2020).
- 1337 [85] Cohen, A. H., Holmes, P. J. & Rand, R. H. The nature of the coupling between segmental  
1338 oscillators of the lamprey spinal generator for locomotion: A mathematical model. *Journal of*  
1339 *Mathematical Biology* **13**, 345–369 (1982).
- 1340 [86] Benitez-Hidalgo, A., Nebro, A. J., Garcia-Nieto, J., Oregi, I. & Del Ser, J. jMetalPy: A Python  
1341 framework for multi-objective optimization with metaheuristics. *Swarm and Evolutionary Com-*  
1342 *putation* **51** (2019).
